# Supplementary material for: The Global Threat of Sinking Deltas
Source: Research Square preprint supplement (doi:10.21203/rs.3.rs-6223150/v1), 2025-04-07
Supplement: Supplementary file 1 [file 9a1d78ab06038070dc23b3d5.docx]

Supplementary Materials for

**The Global Threat of Sinking Deltas**

Leonard O. Ohenhen, Manoochehr Shirzaei, James Davis, Ashutosh Tiwari, RobertNicholls, Oluwaseyi Dasho, Nitheshnirmal Sadhasivam, Katharina Seeger, Susanna Werth, Austin Chadwick, Florence Onyike, Jonathan Lucy, Carmen Atkins, Samuel Daramola, Alexander Ankamah, Philip S. Minderhoud, Gergino C. Yemele

Corresponding author: [ohleonard@ldeo.columbia.edu](mailto:ohleonard@ldeo.columbia.edu)

**The PDF file includes:**

Supplementary Figs. 1 to 15

Supplementary Tables 1 to 3


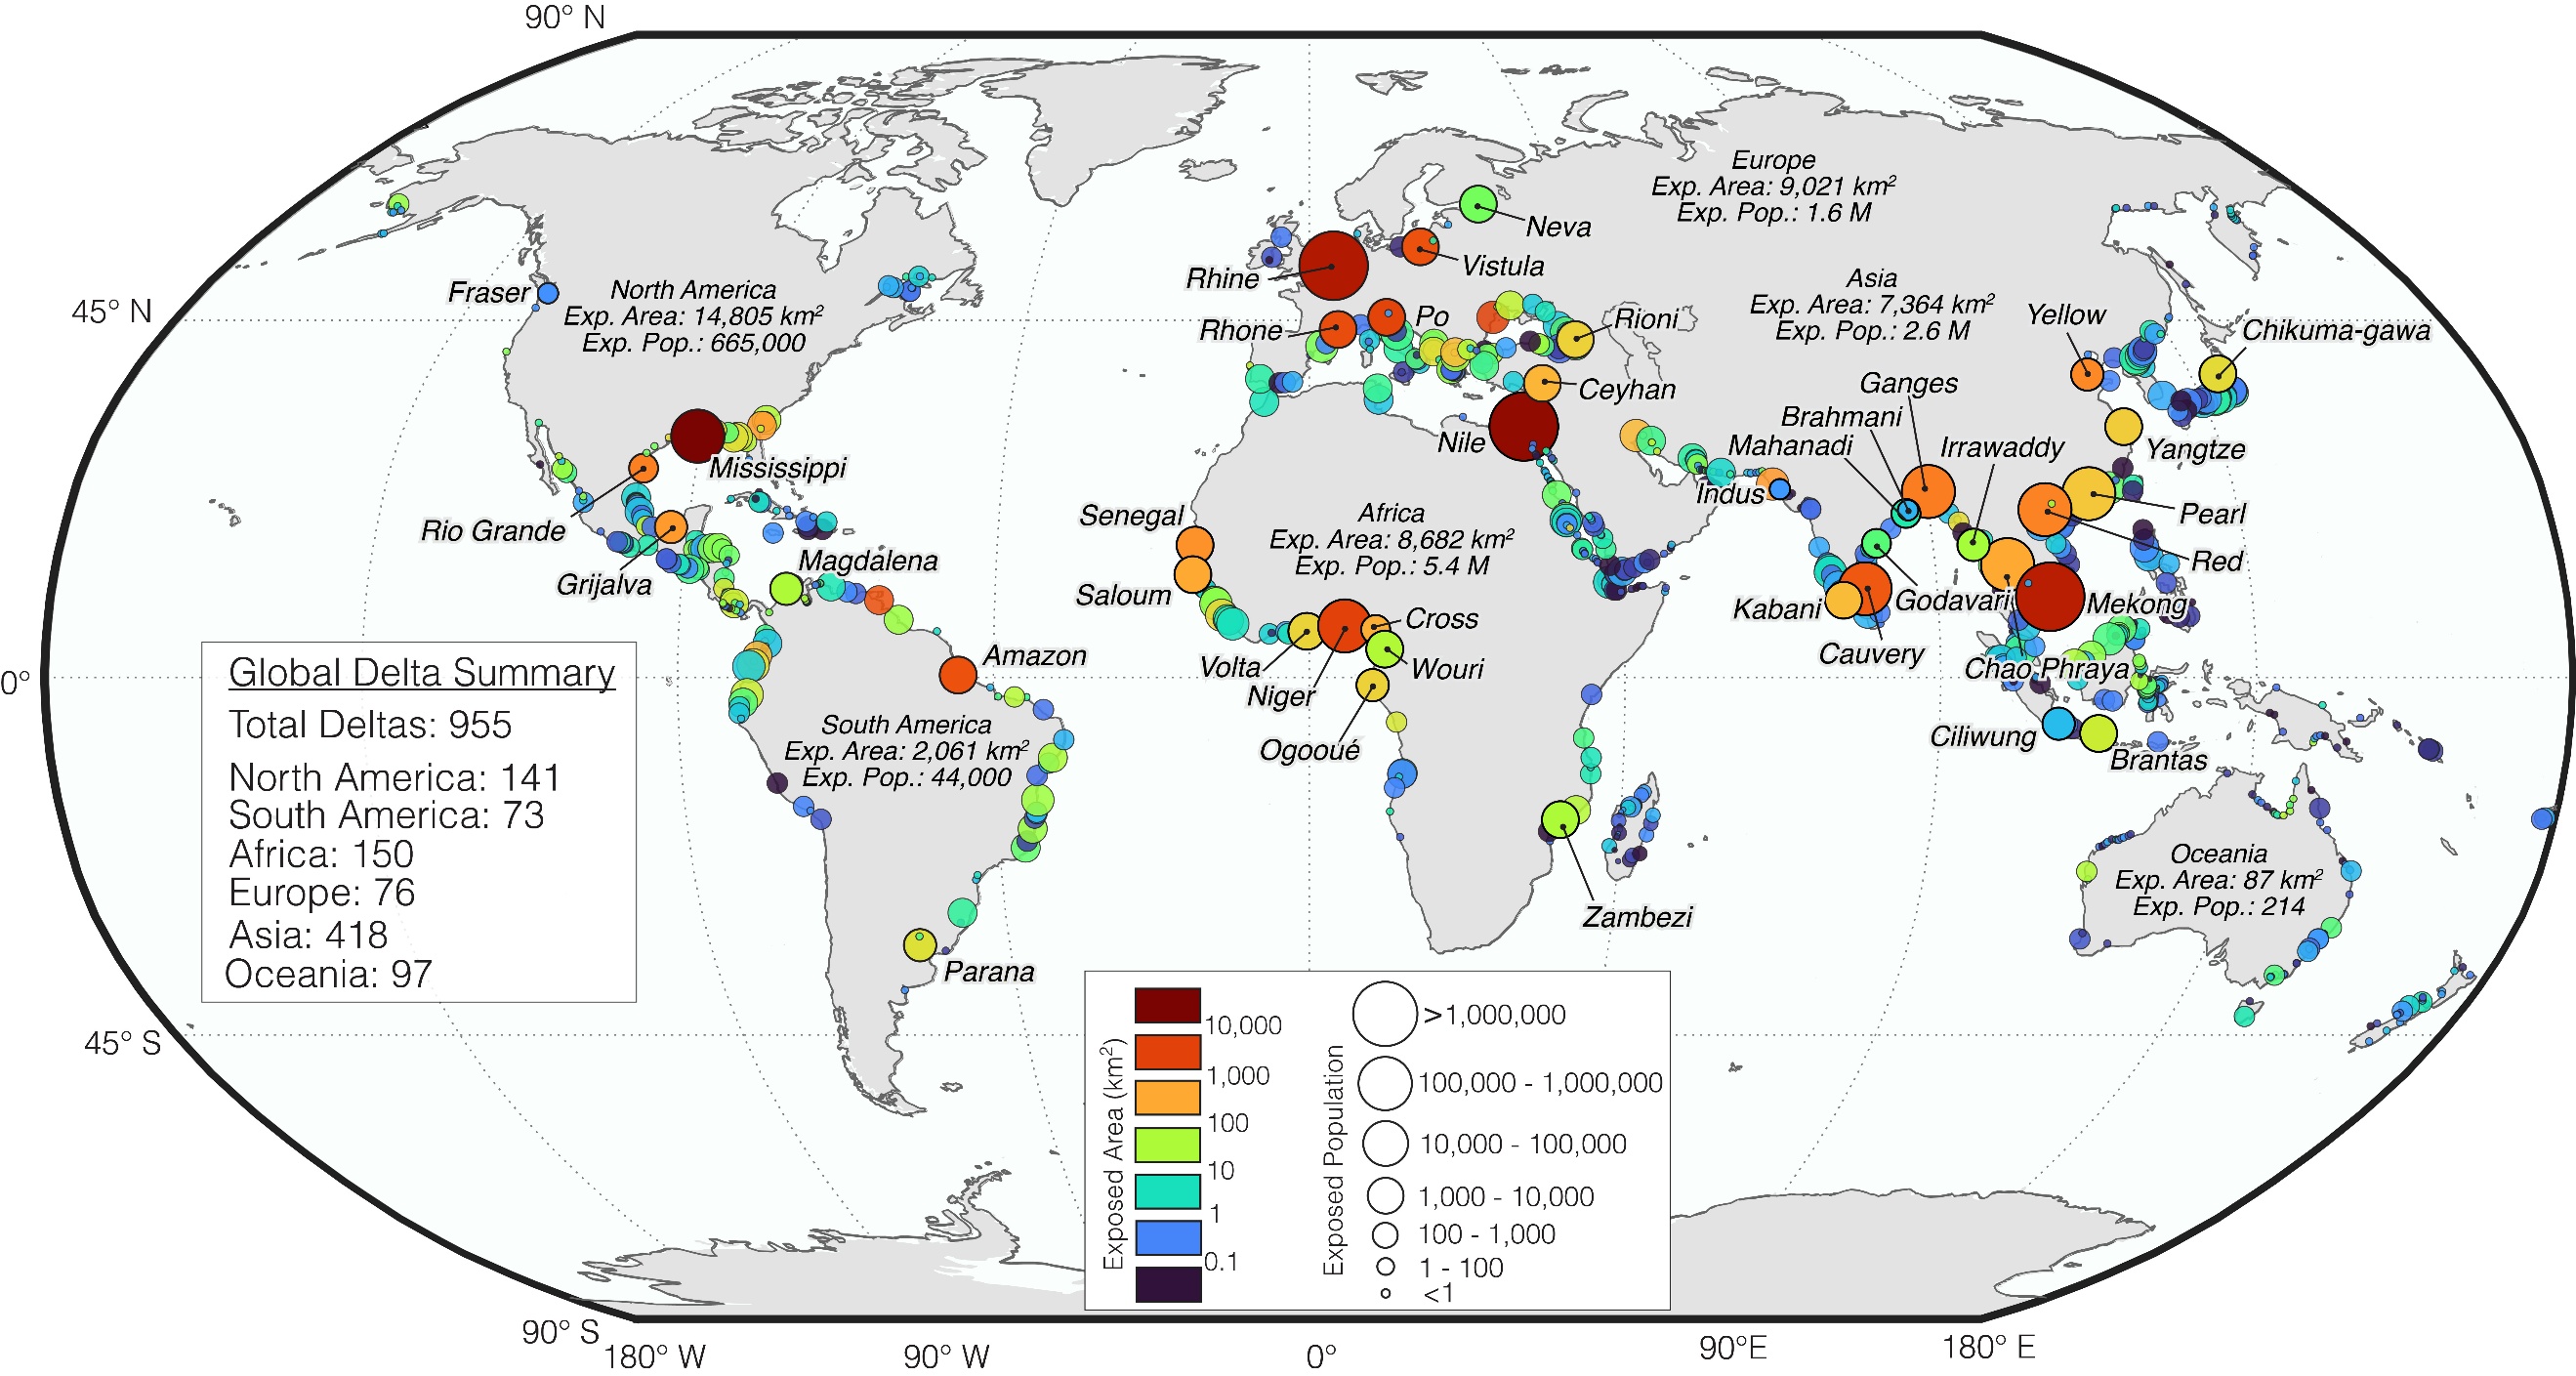


**Fig. 1. Global Distribution of Delta Area and Population Below Mean Sea Level.** Each circle represents one of the 955 global deltas from Edmonds et al.*6*, with latitude constrained to below 60°N due to limitations in the digital elevation model dataset. The circle color indicates the land area below mean sea level (exposed area), while the circle sizes represent the population living in those areas (exposed population). The 40 deltas selected for this study are labelled.


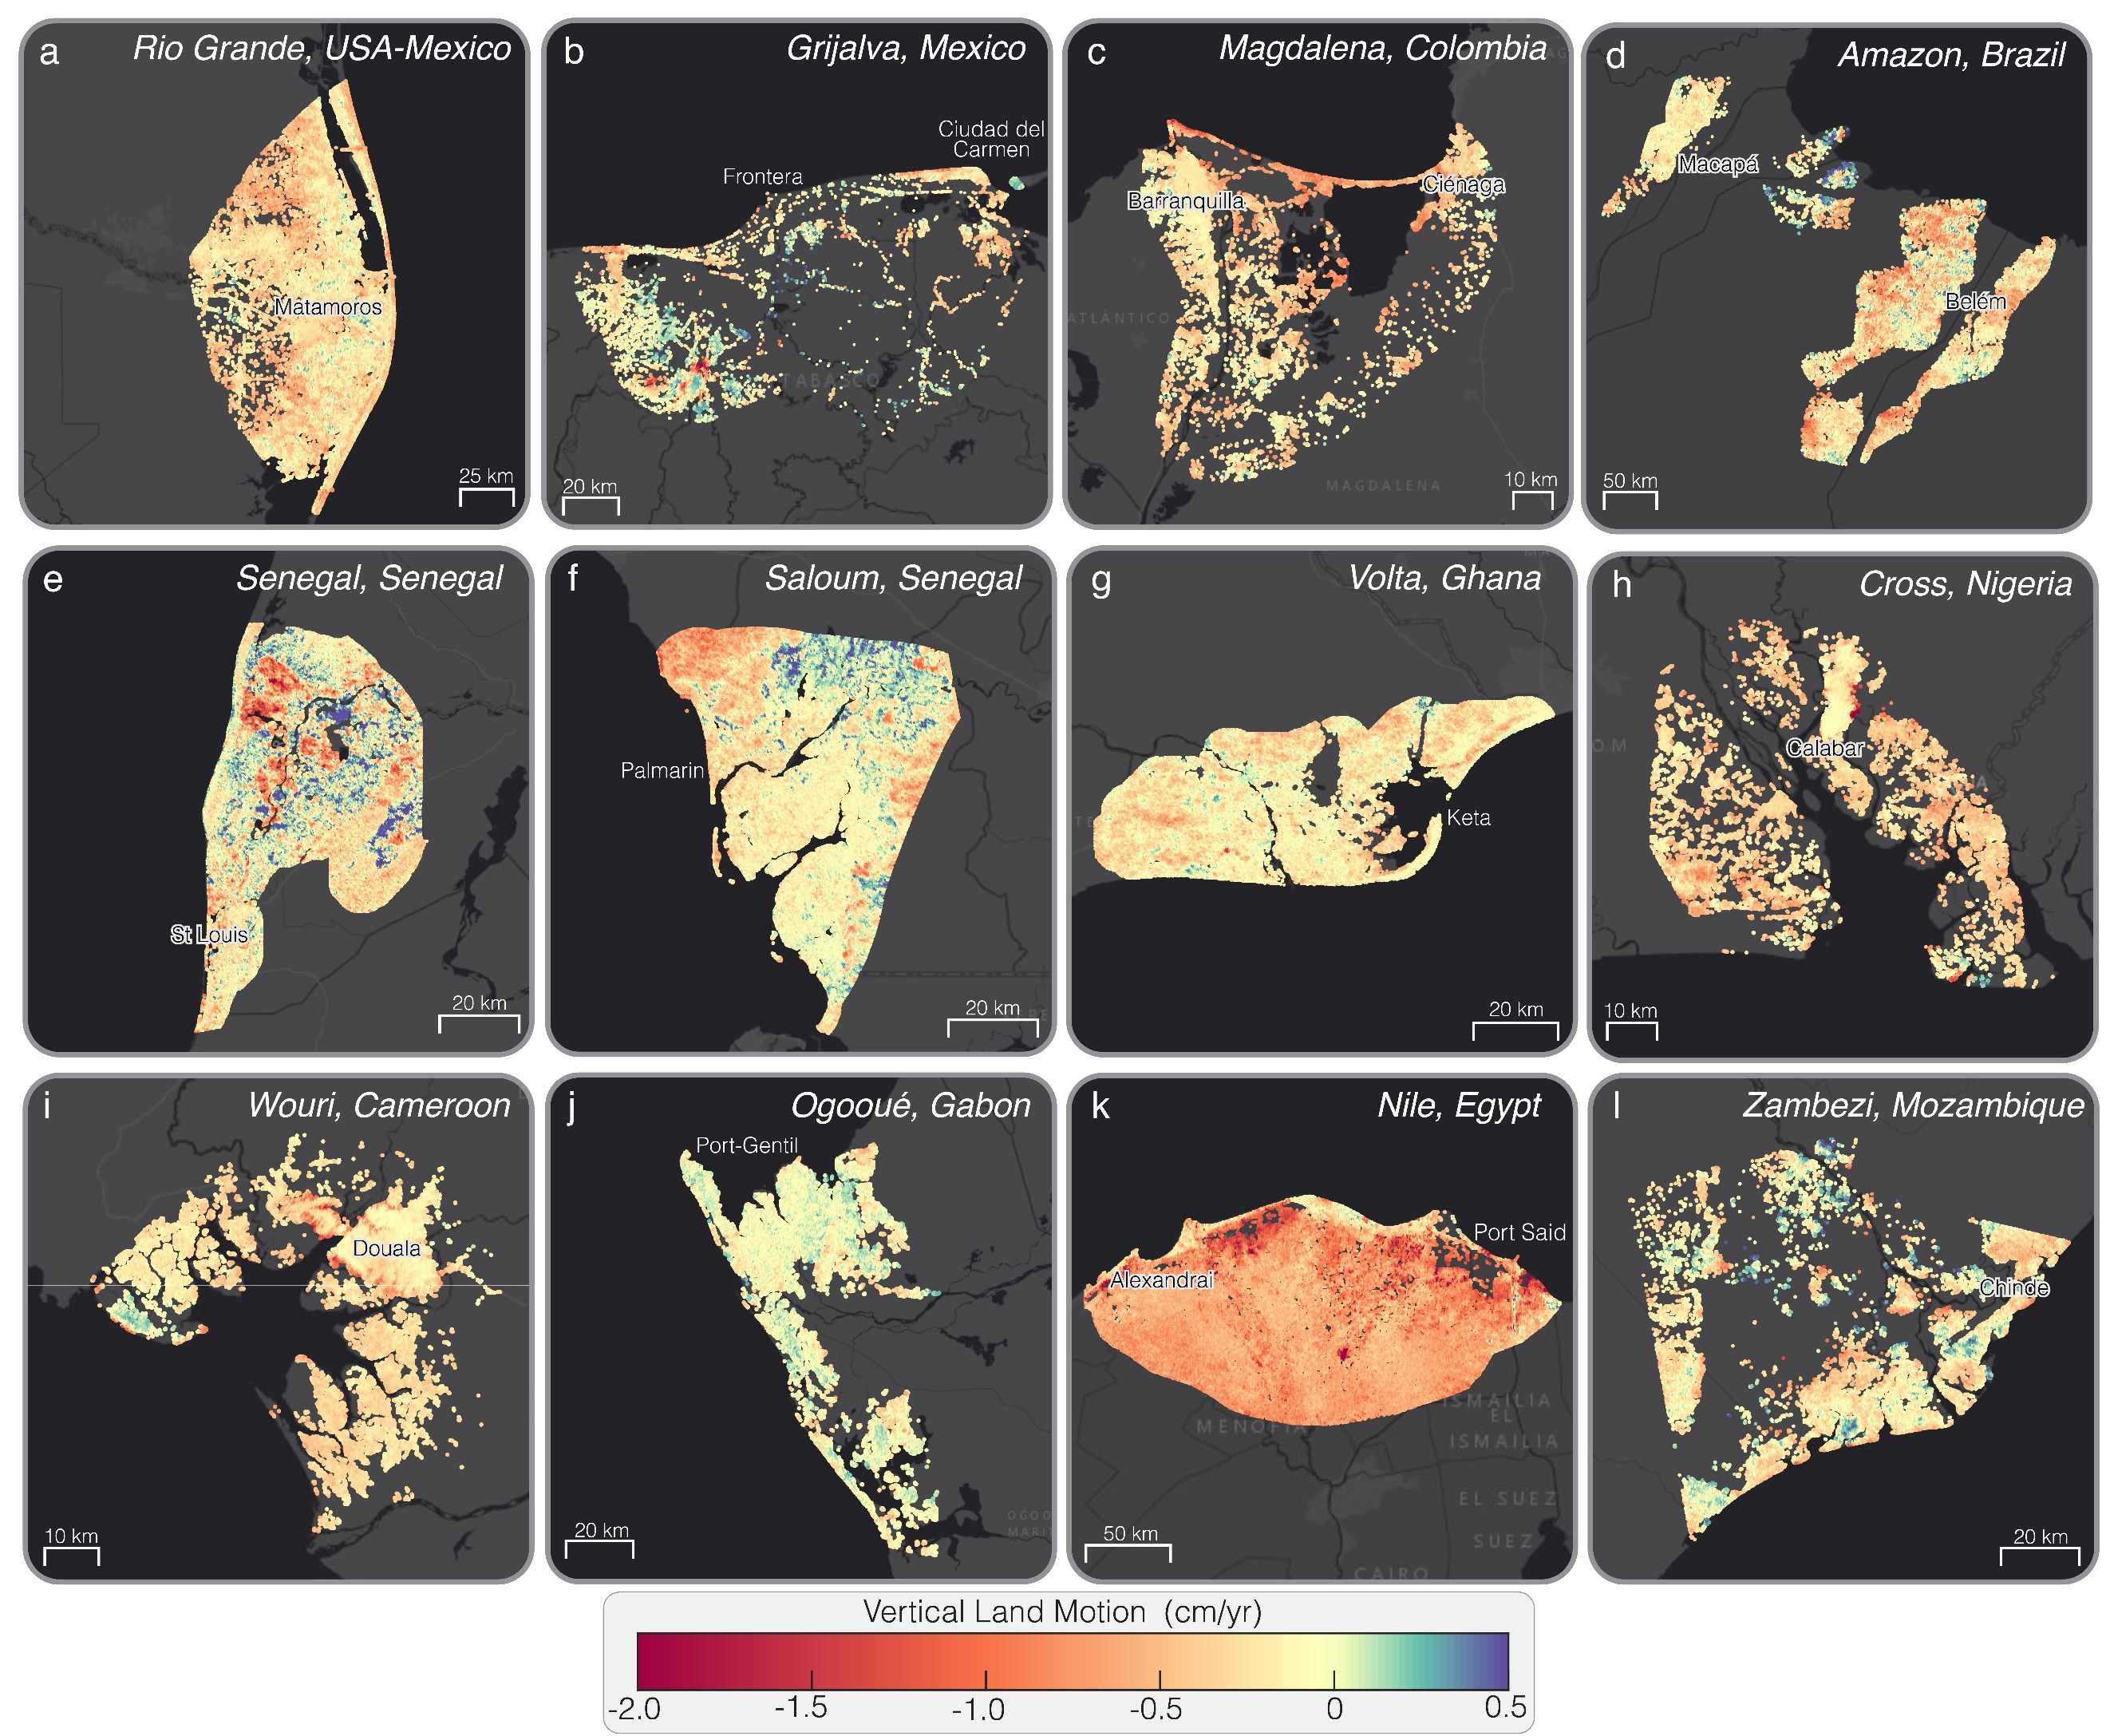


**Fig. 2. Spatial Pattern of Vertical Land Motion (VLM) in Deltas.** Spatial maps of VLM rates for the **(a)** Rio Grande (USA-Mexico), **(b)** Grijalva (Mexico), **(c)** Magdalena (Colombia), **(d)** Amazon (Brazil), **(e)** Senegal (Senegal), **(f)** Saloum (Senegal), **(g)** Volta (Ghana), **(h)** Cross (Nigeria), **(i)** Wouri (Cameroon), **(j)** Ogooué (Gabon), **(k)** Nile (Egypt), and **(l)** Zambezi (Mozambique) deltas (background image: ESRI, streets-dark). Positive VLM (green-purple hues) indicates elevation gain (uplift), while negative VLM (yellow-orange-red hues) indicates elevation loss (land subsidence).


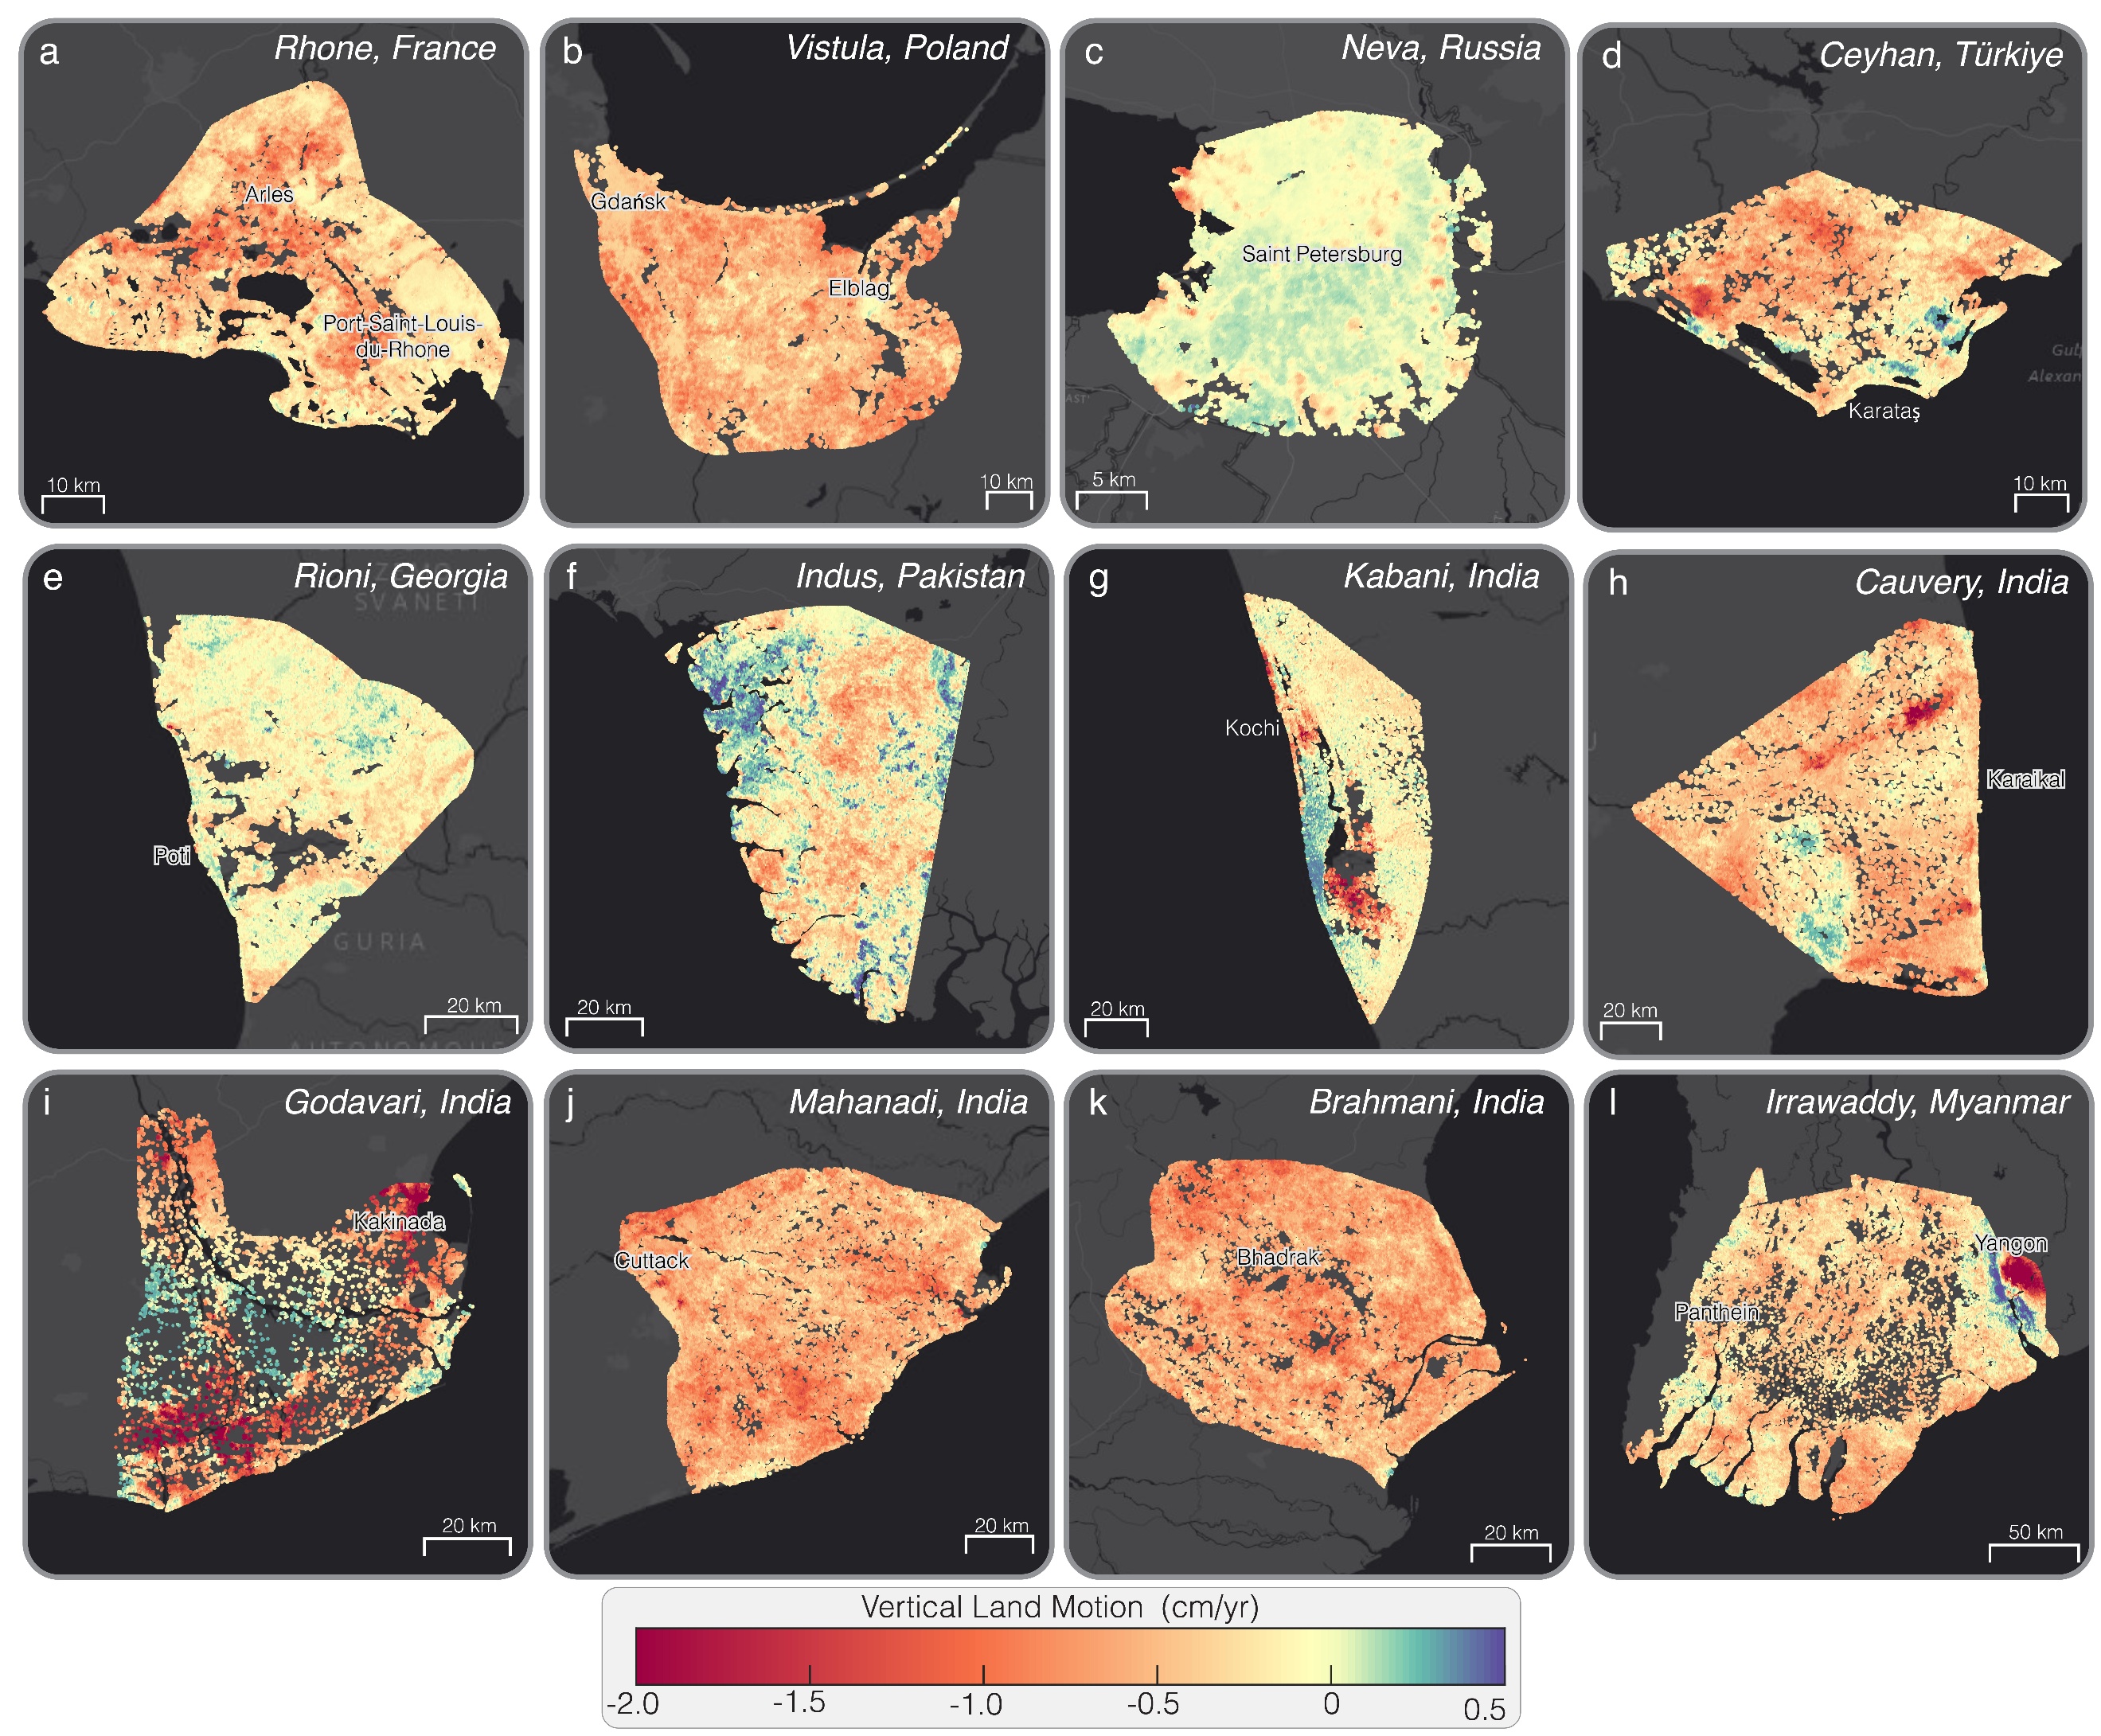


**Fig. 3. Spatial Pattern of Vertical Land Motion (VLM) in Deltas.** Spatial maps of VLM rates for the **(a)** Rhone (France), **(b)** Vistula (Poland), **(c)** Neva (Russia), **(d)** Ceyhan (Türkiye), **(e)** Rioni (Georgia), **(f)** Indus (Pakistan), **(g)** Kabani (India), **(h)** Cauvery (India), **(i)** Godavari (Cameroon), **(j)** Mahanadi (India), **(k)** Brahmani (India), and **(l)** Irrawaddy (Myanmar) deltas (background image: ESRI, streets-dark). Positive VLM (green-purple hues) indicates elevation gain (uplift), while negative VLM (yellow-orange-red hues) indicates elevation loss (land subsidence).


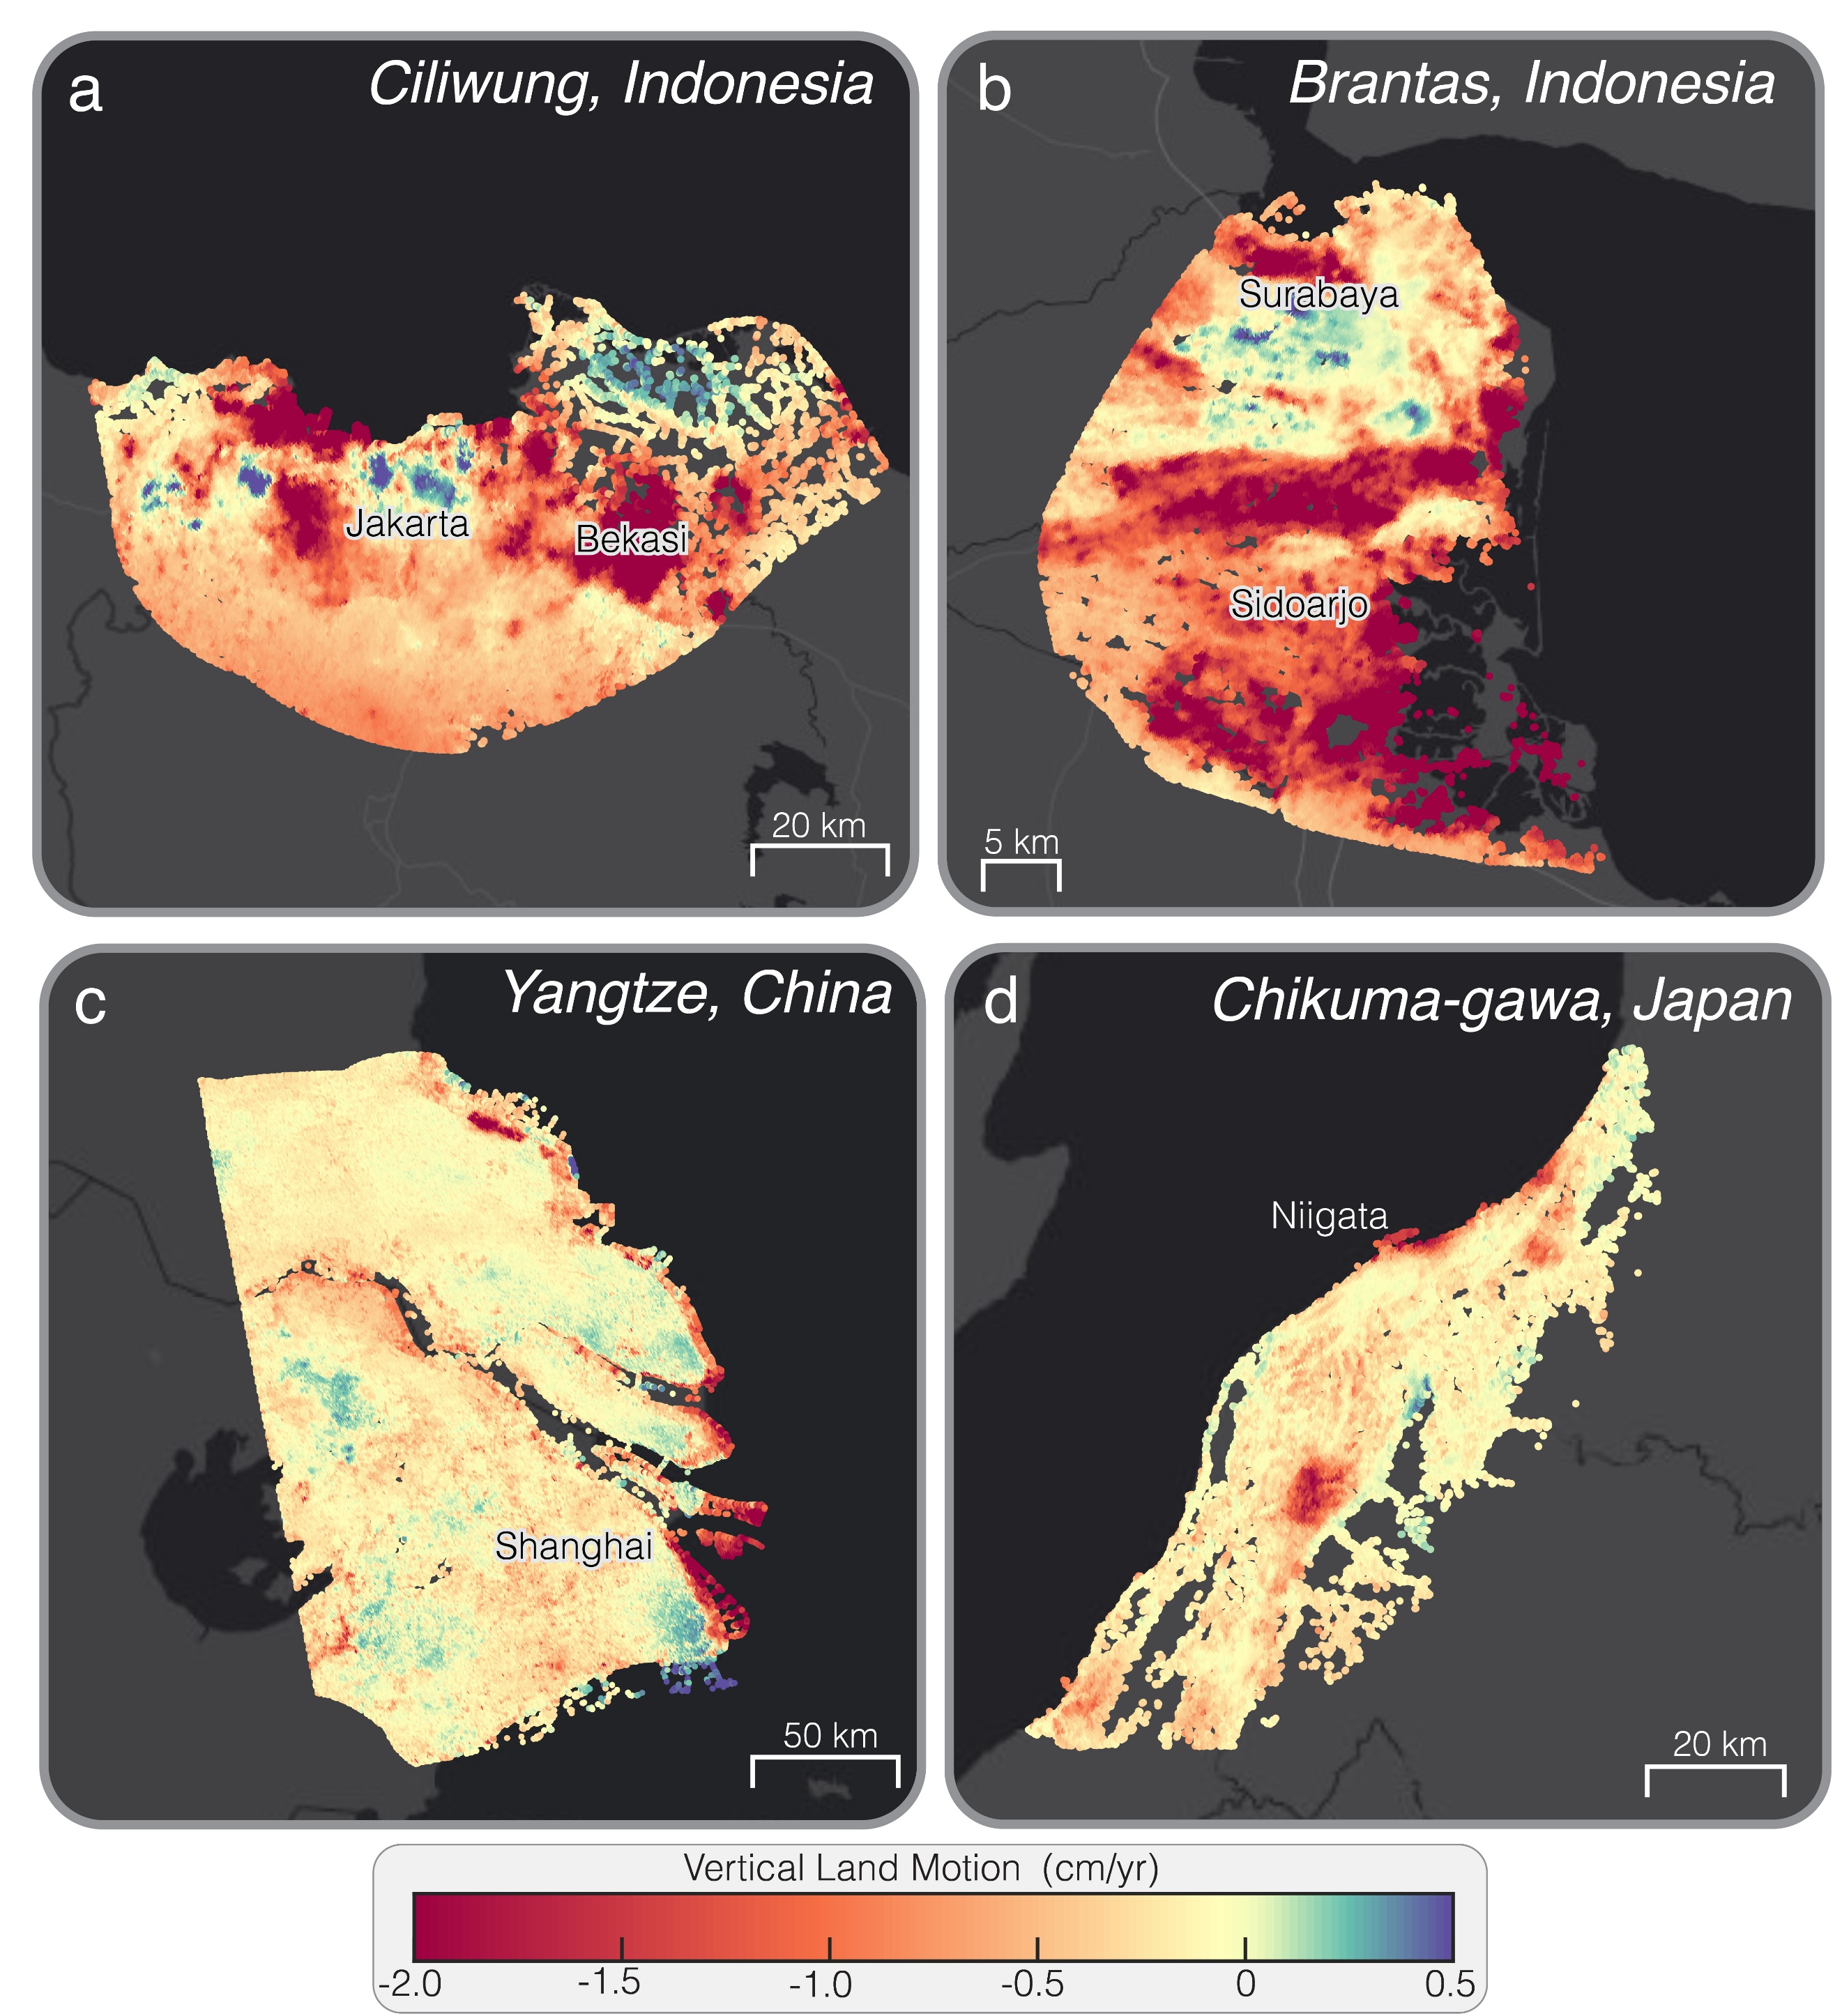


**Fig. 4. Spatial Pattern of Vertical Land Motion (VLM) in Deltas.** Spatial maps of VLM rates for the **(a)** Ciliwung (Indonesia), **(b)** Brantas (Indonesia), **(c)** Yangtze (China), and **(d)** Chikuma-gawa (Japan) deltas (background image: ESRI, streets-dark). Positive VLM (green-purple hues) indicates elevation gain (uplift), while negative VLM (yellow-orange-red hues) indicates elevation loss (land subsidence).


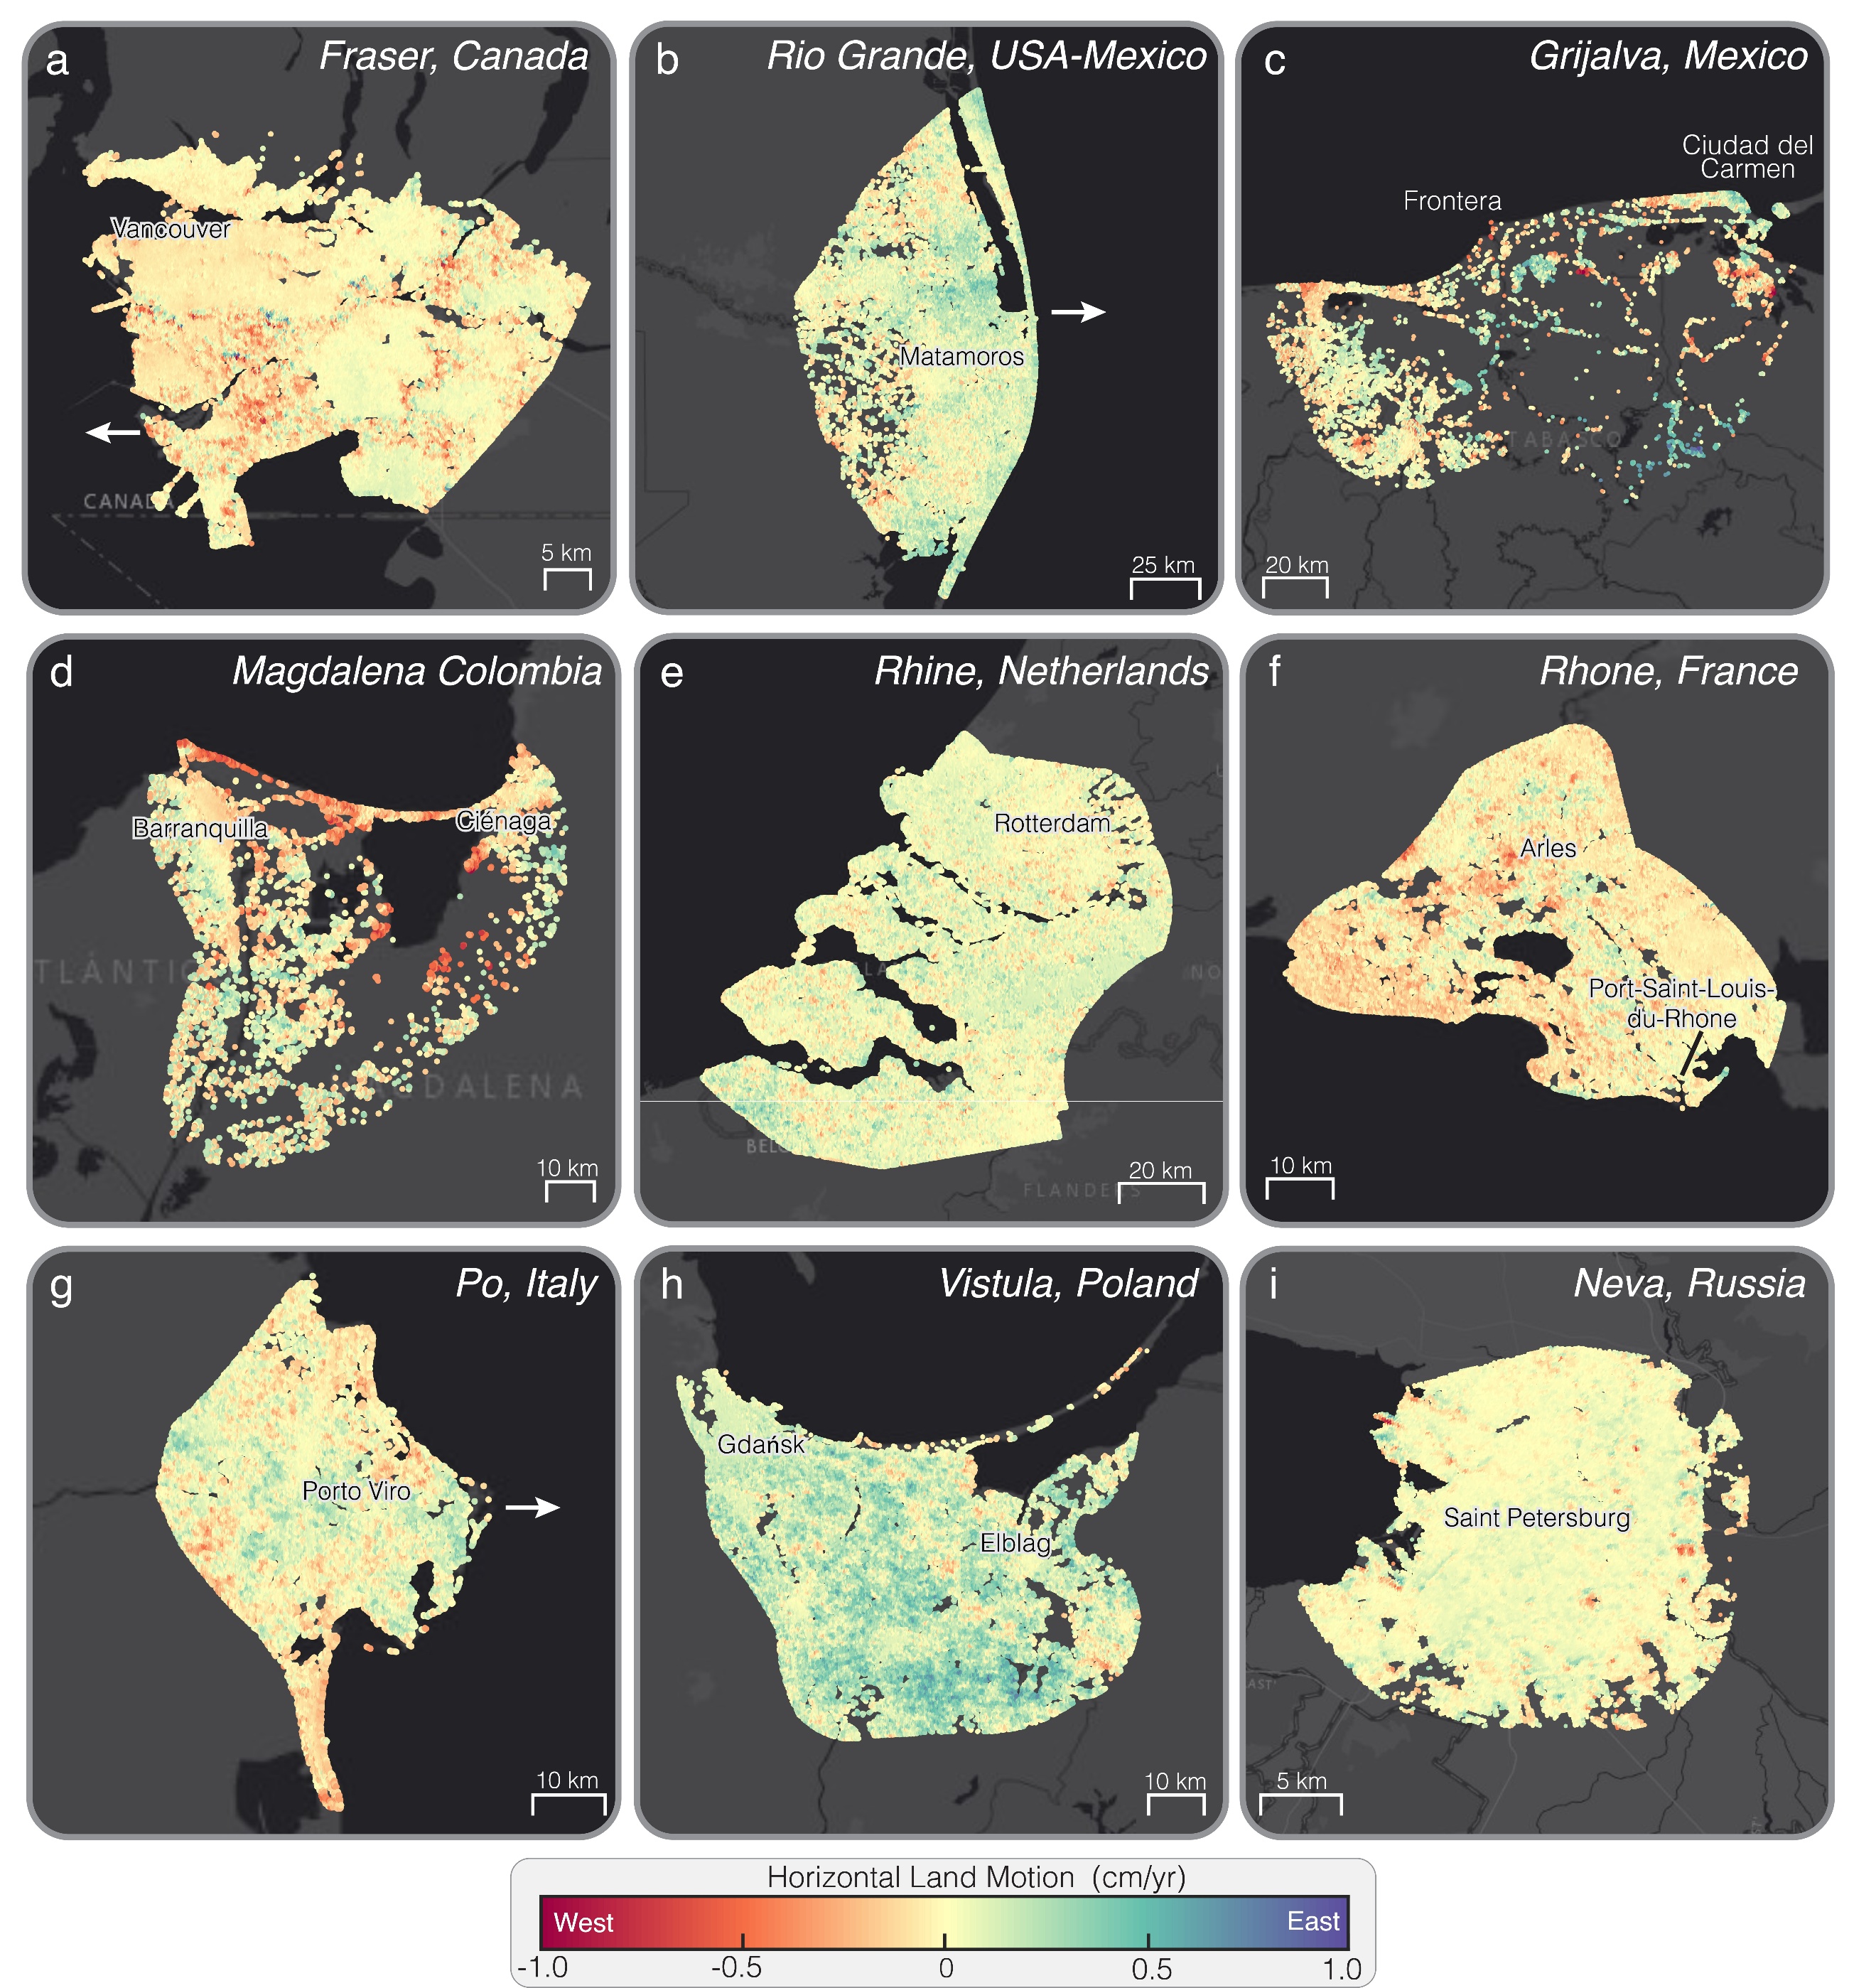


**Fig. 5. Spatial Pattern of Horizontal Land Motion (HLM) in Deltas.** Spatial map of HLM for the **(a)** Fraser (Canada), **(b)** Rio Grande (USA-Mexico), **(c)** Grijalva (Mexico), **(d)** Magdalena (Colombia), **(e)** Rhine (the Netherlands), **(f)** Rhone (France), **(g)** Po (Italy), **(h)** Vistula (Poland), and **(i)** Neva (Russia) deltas (background image: ESRI, streets-dark). Positive HLM (green-purple hues) indicates eastward motion, while negative HLM (yellow-orange-red hues) indicates westward motion. Near-zero HLM (yellow hues) represents areas with minimal horizontal displacement.


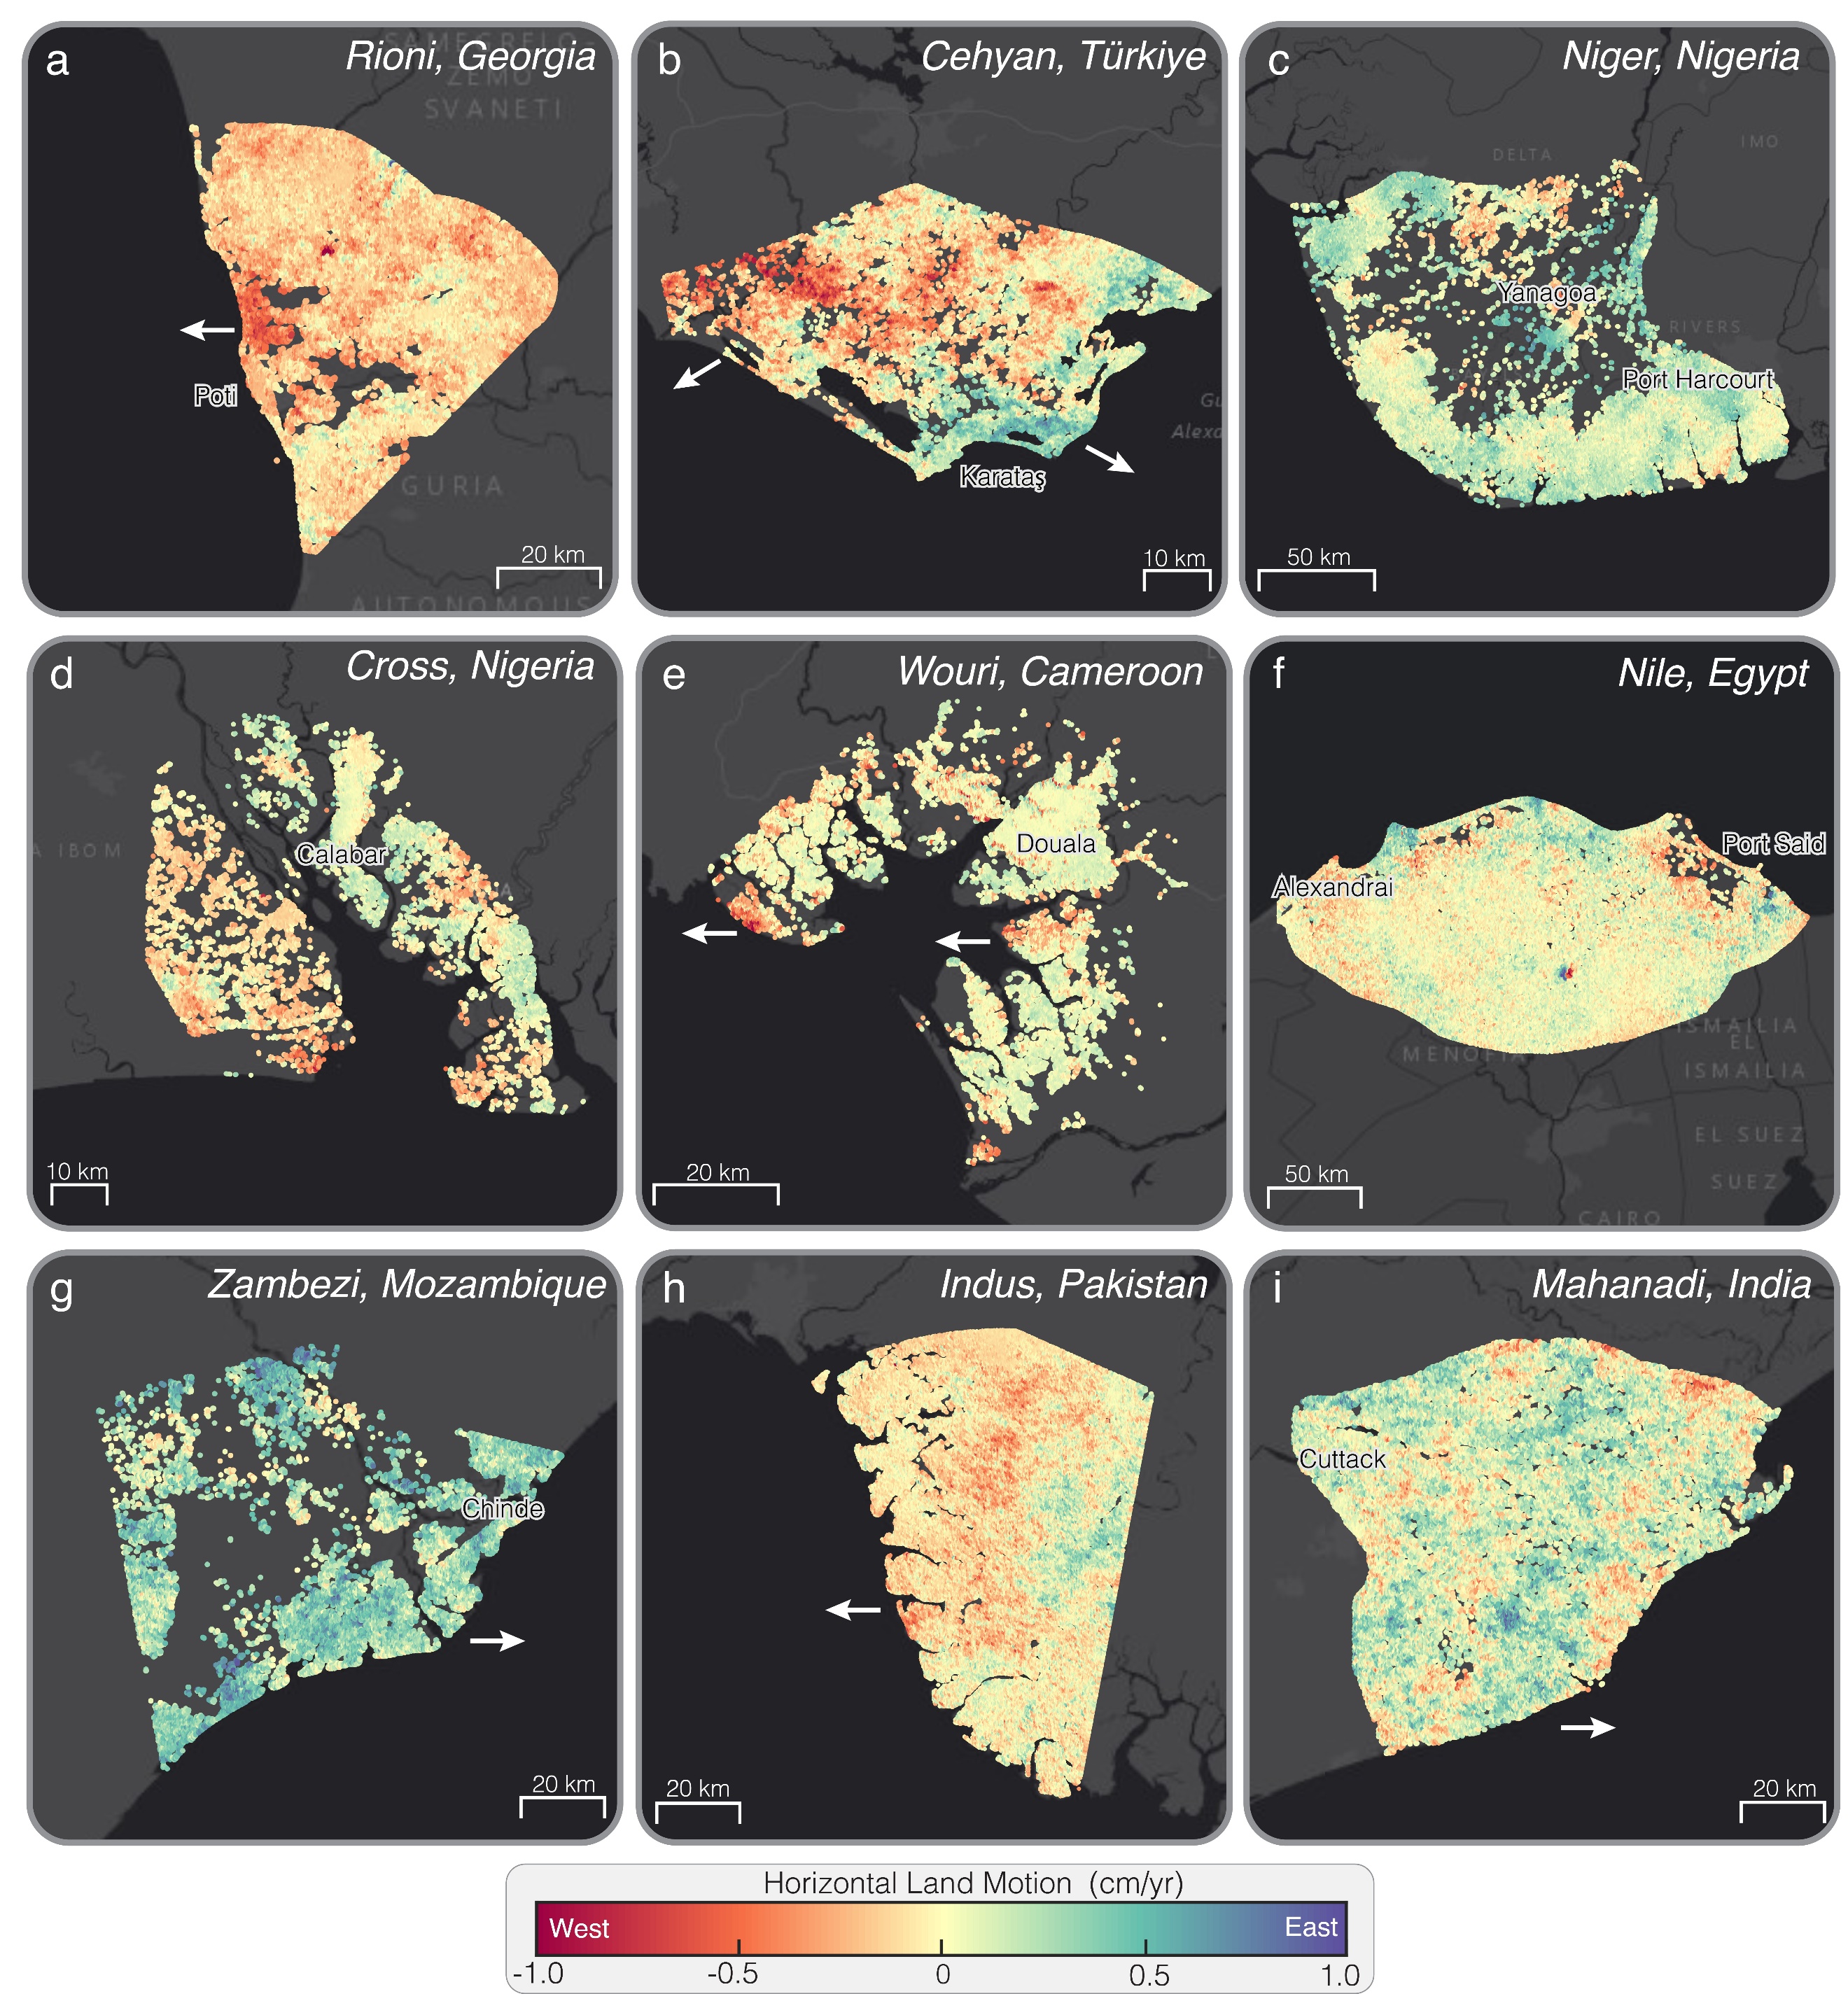


**Fig. 6. Spatial Pattern of Horizontal Land Motion (HLM) in Deltas.** Spatial map of HLM for the **(a)** Rioni (Georgia), **(b)** Ceyhan (Türkiye), **(c)** Niger (Nigeria), **(d)** Cross (Nigeria), **(e)** Wouri (Cameroon), **(f)** Nile (Egypt), **(g)** Zambezi (Mozambique), **(h)** Indus (Pakistan), and **(i)** Mahanadi (India) deltas (background image: ESRI, streets-dark). Positive HLM (green-purple hues) indicates eastward motion, while negative HLM (yellow-orange-red hues) indicates westward motion. Near-zero HLM (yellow hues) represents areas with minimal horizontal displacement.


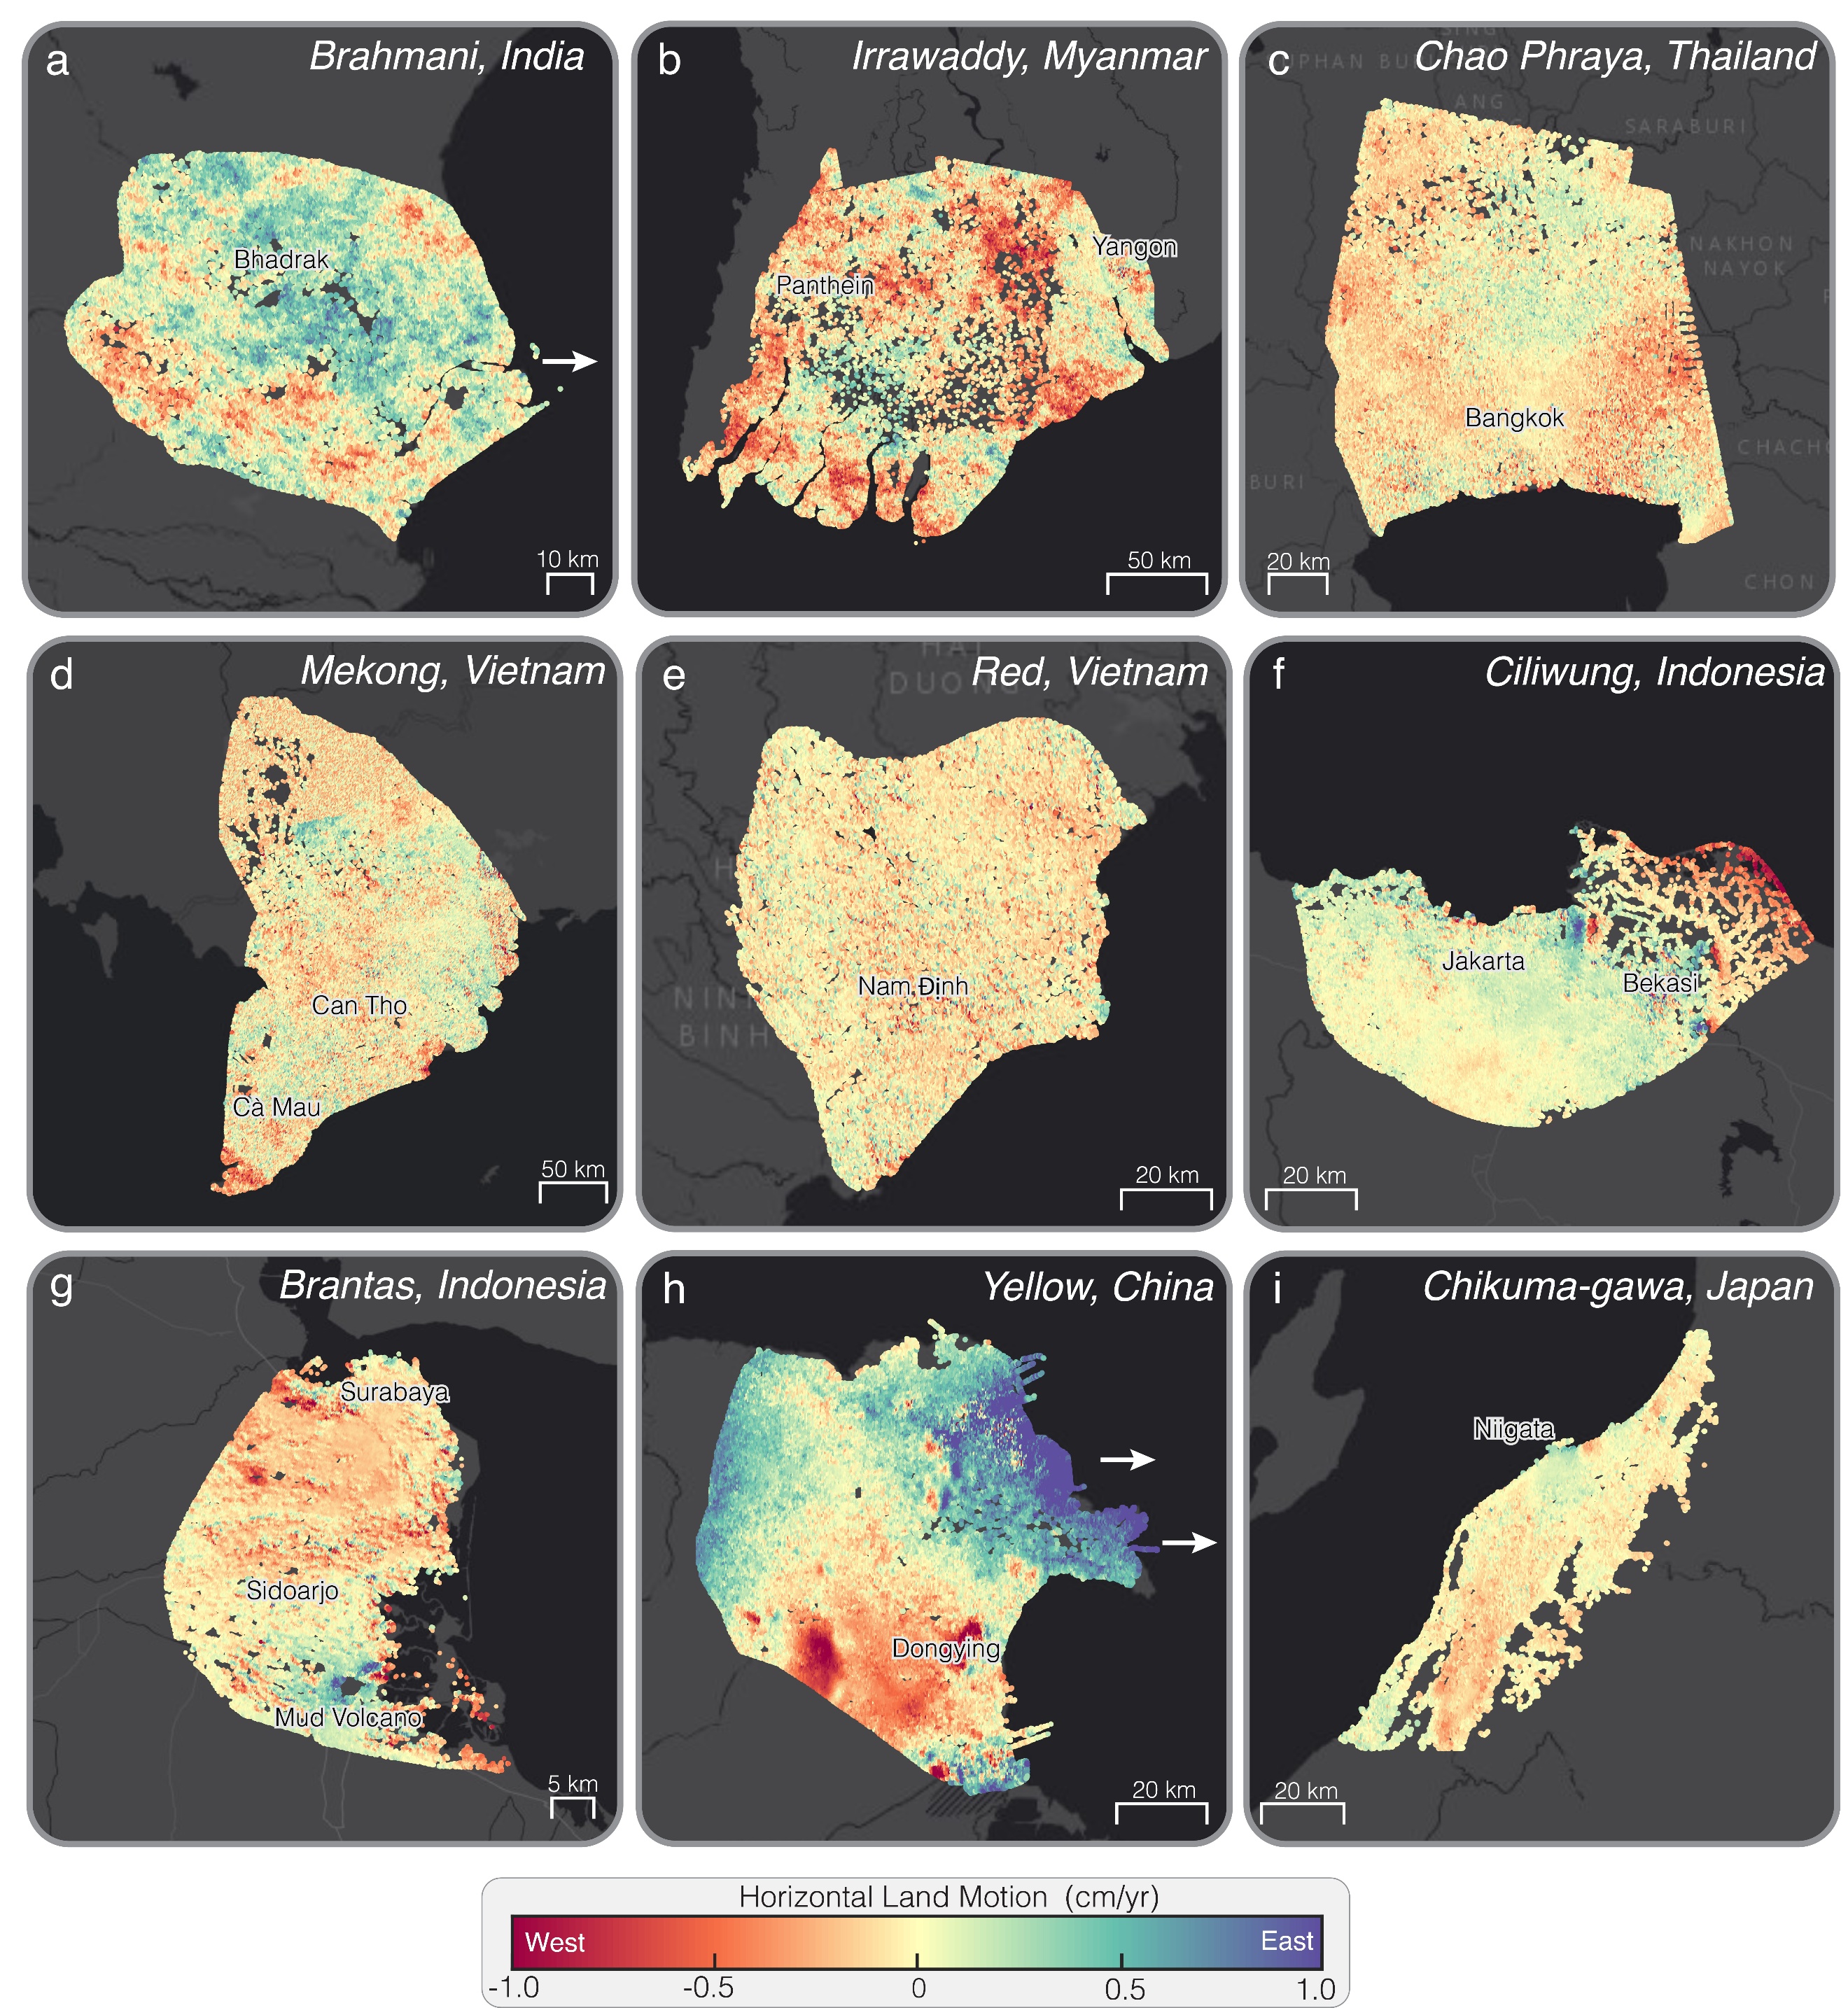


**Fig. 7. Spatial Pattern of Horizontal Land Motion (HLM) in Deltas.** Spatial map of HLM for the **(a)** Brahmani (India), **(b)** Irrawaddy (Myanmar), **(c)** Chao Phraya (Thailand), **(d)** Mekong (Vietnam), **(e)** Red (Vietnam), **(f)** Ciliwung (Indonesia), **(g)** Brantas (Indonesia), **(h)** Yellow (China), and **(i)** Chikuma-gawa (Japan) deltas (background image: ESRI, streets-dark). Positive HLM (green-purple hues) indicates eastward motion, while negative HLM (yellow-orange-red hues) indicates westward motion. Near-zero HLM (yellow hues) represents areas with minimal horizontal displacement.


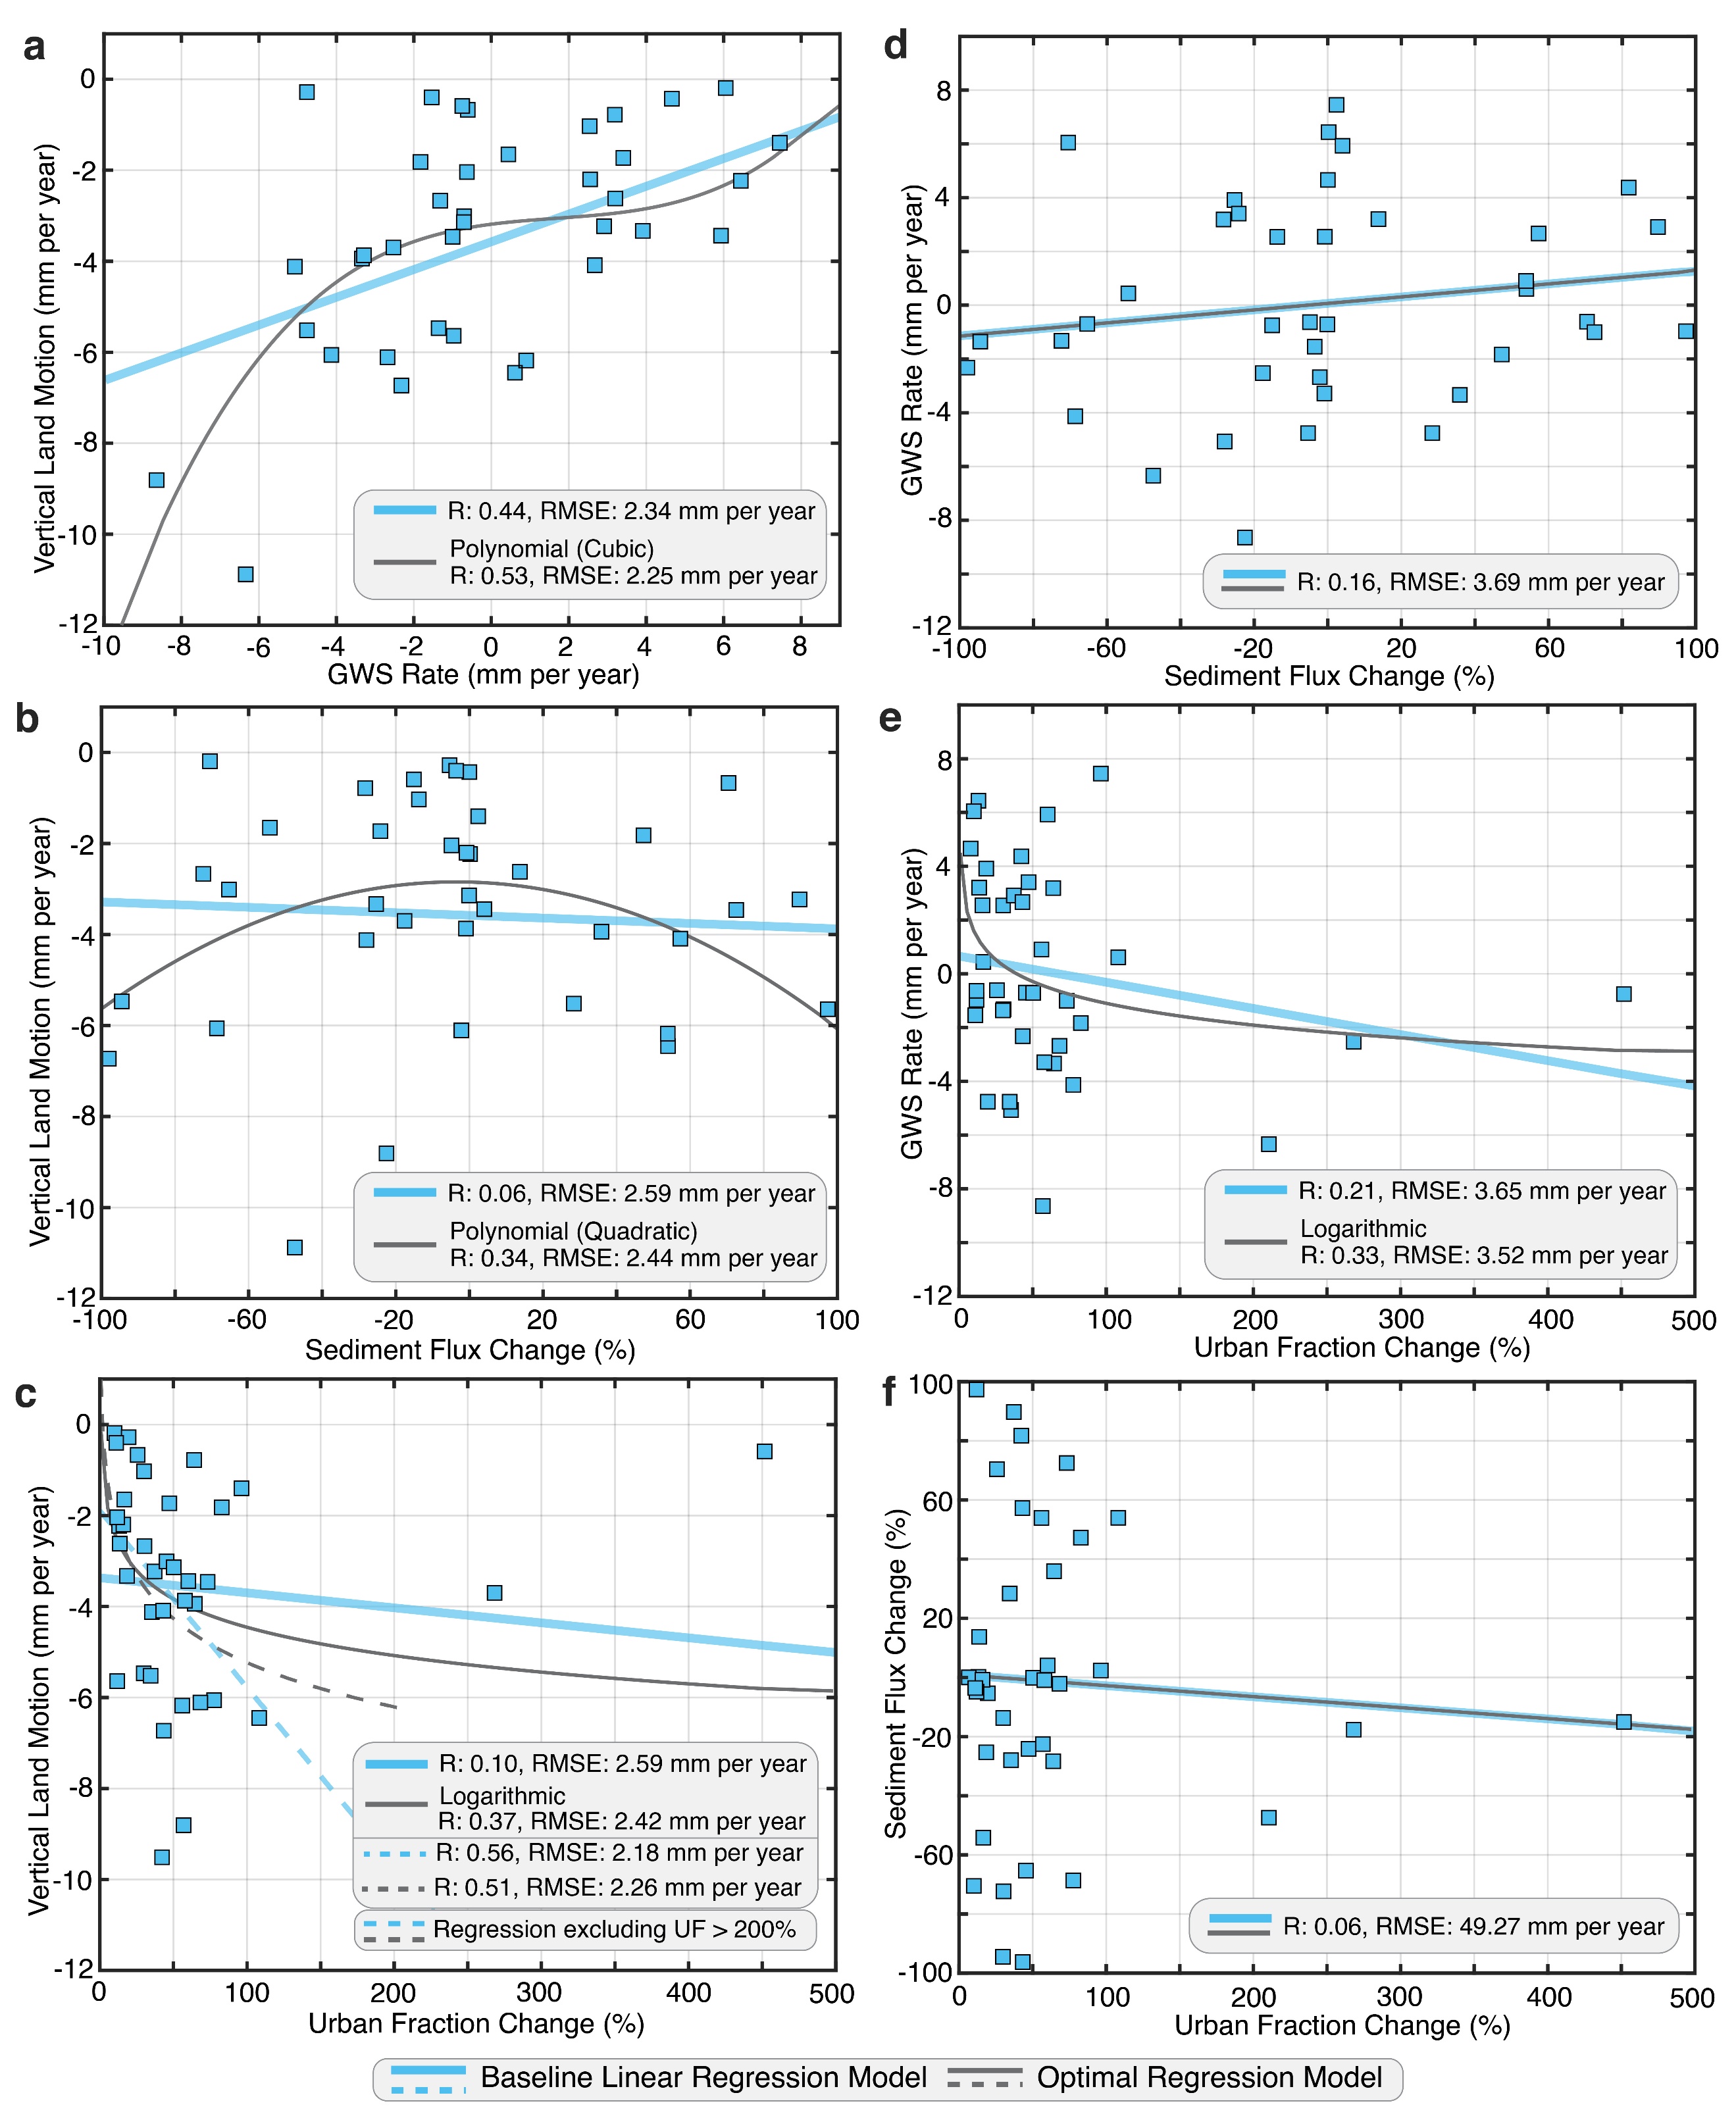


**Fig. 8. Relationship between Vertical Land Motion (VLM) Rates and Anthropogenic Drivers.** Scatter plots of VLM (mm per year) versus **(a)** groundwater storage (GWS) rate (mm per year), **(b)** sediment flux change (%), and **(c)** urban fraction (UF) change (%) for the 40 deltas. Scatter plot of GWS rate (mm per year) versus **(d)** sediment flux change (%) and **(e)** UF change (%). **(f)** Scatter plot of sediment flux change (%) versus UF change (%). Each relationship is analyzed using linear regression as well as polynomial and logarithmic regression models to assess the best-fit representation.


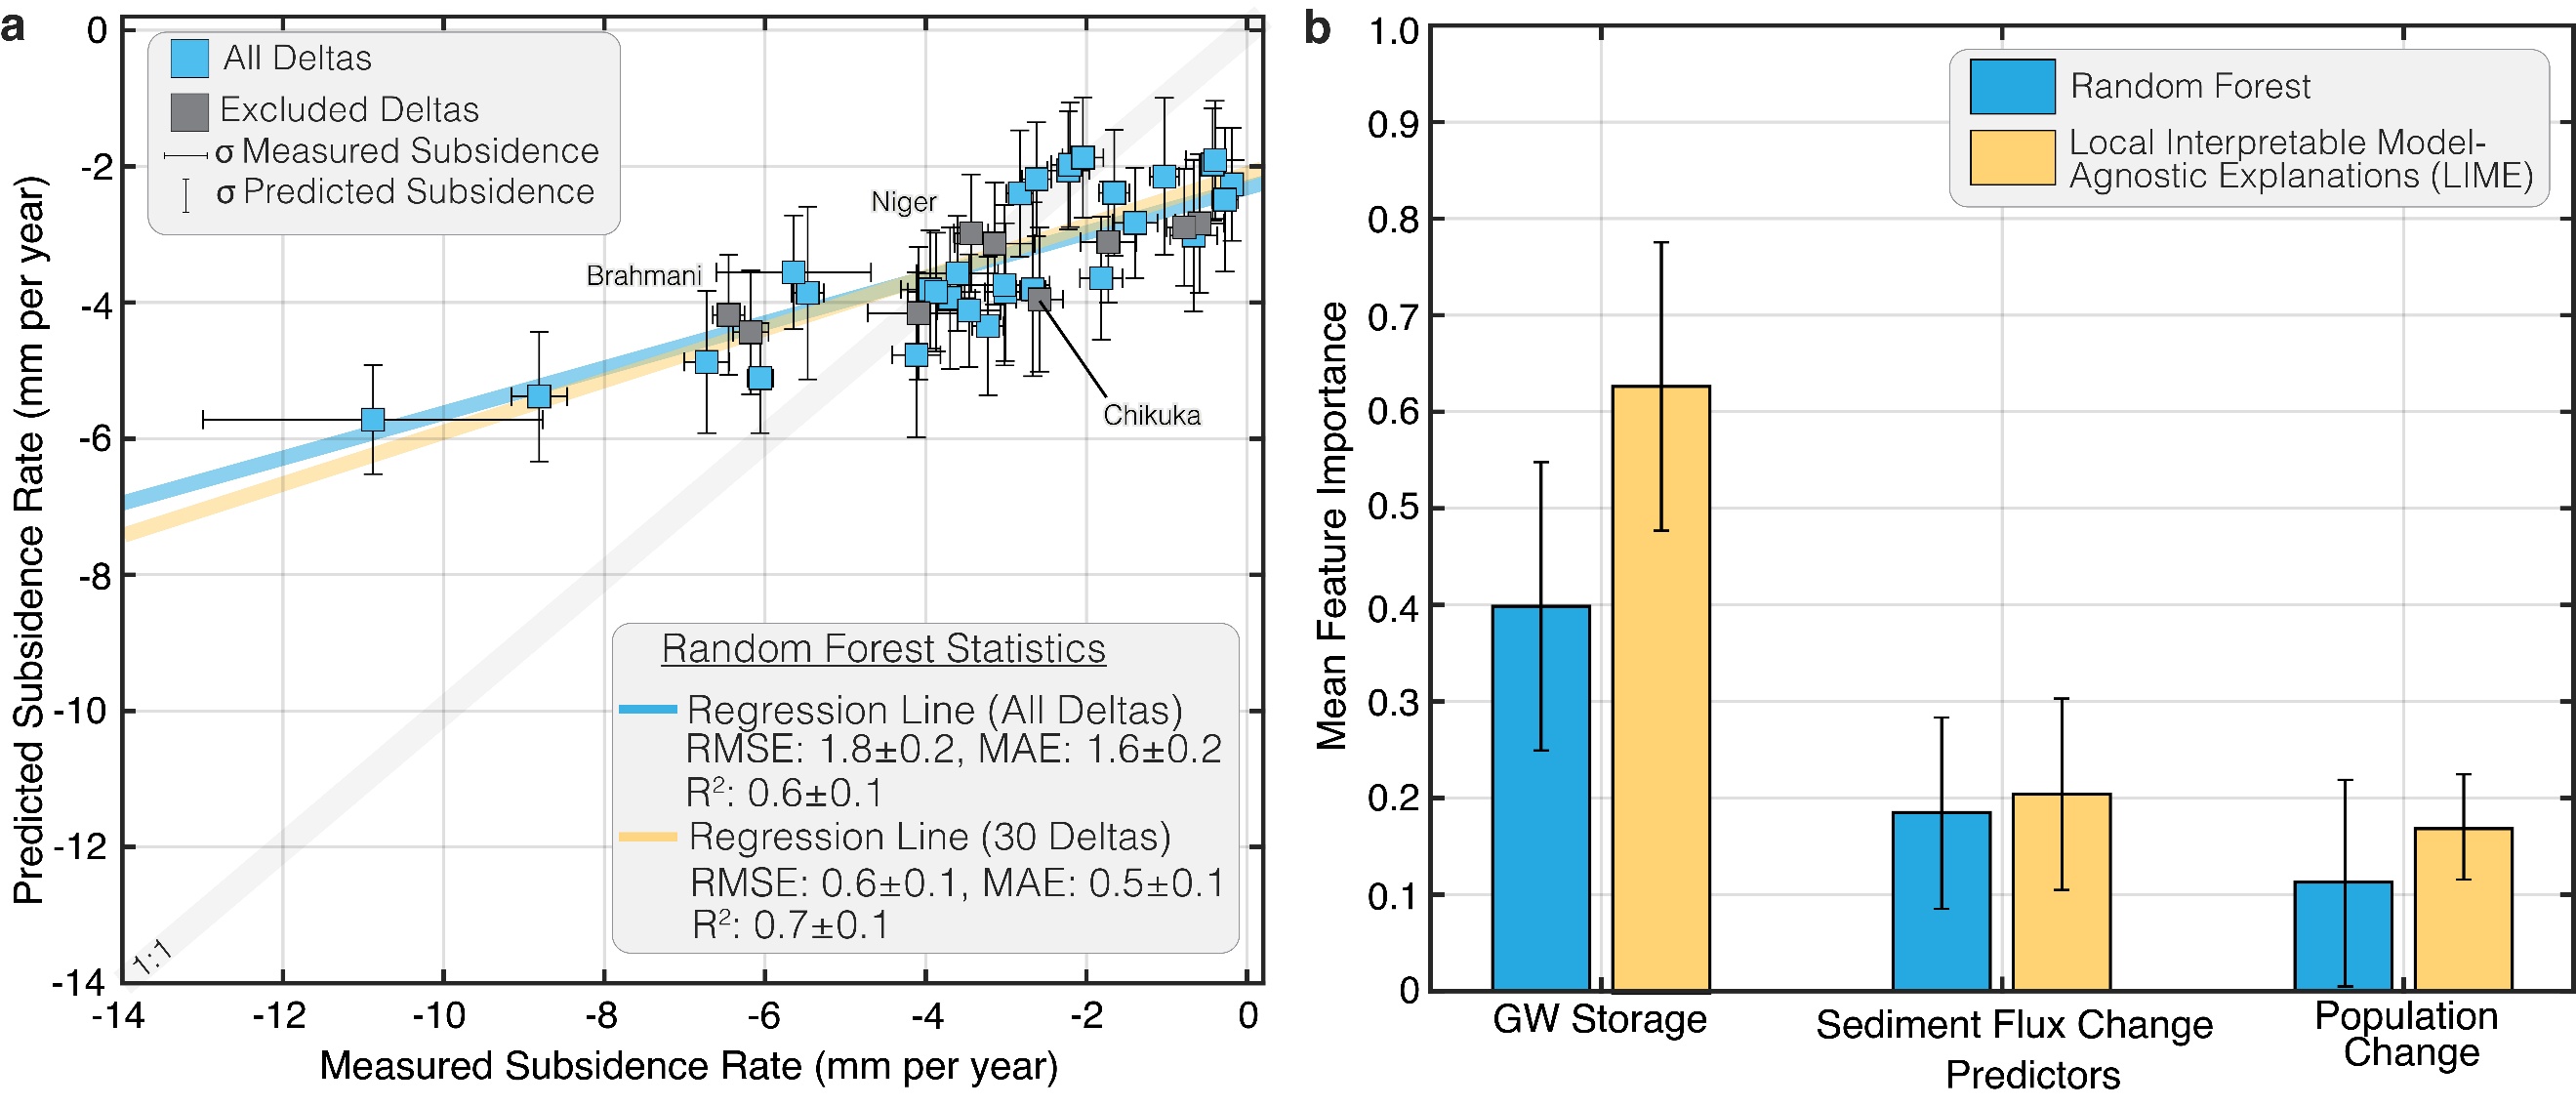


**Fig. 9. Random Forest (RF) Analysis of Subsidence in 40 Deltas. (a)** Scatter plot of predicted versus measured subsidence rate (mm per year) derived from the RF model. Gray squares represent deltas excluded due to low Local Interpretable Model-Agnostic Explanations (LIME) fidelity (R2 < 0.5). **(b)** RF- and LIME-derived feature importance for predictors (groundwater storage, sediment flux change, and urban fraction change).


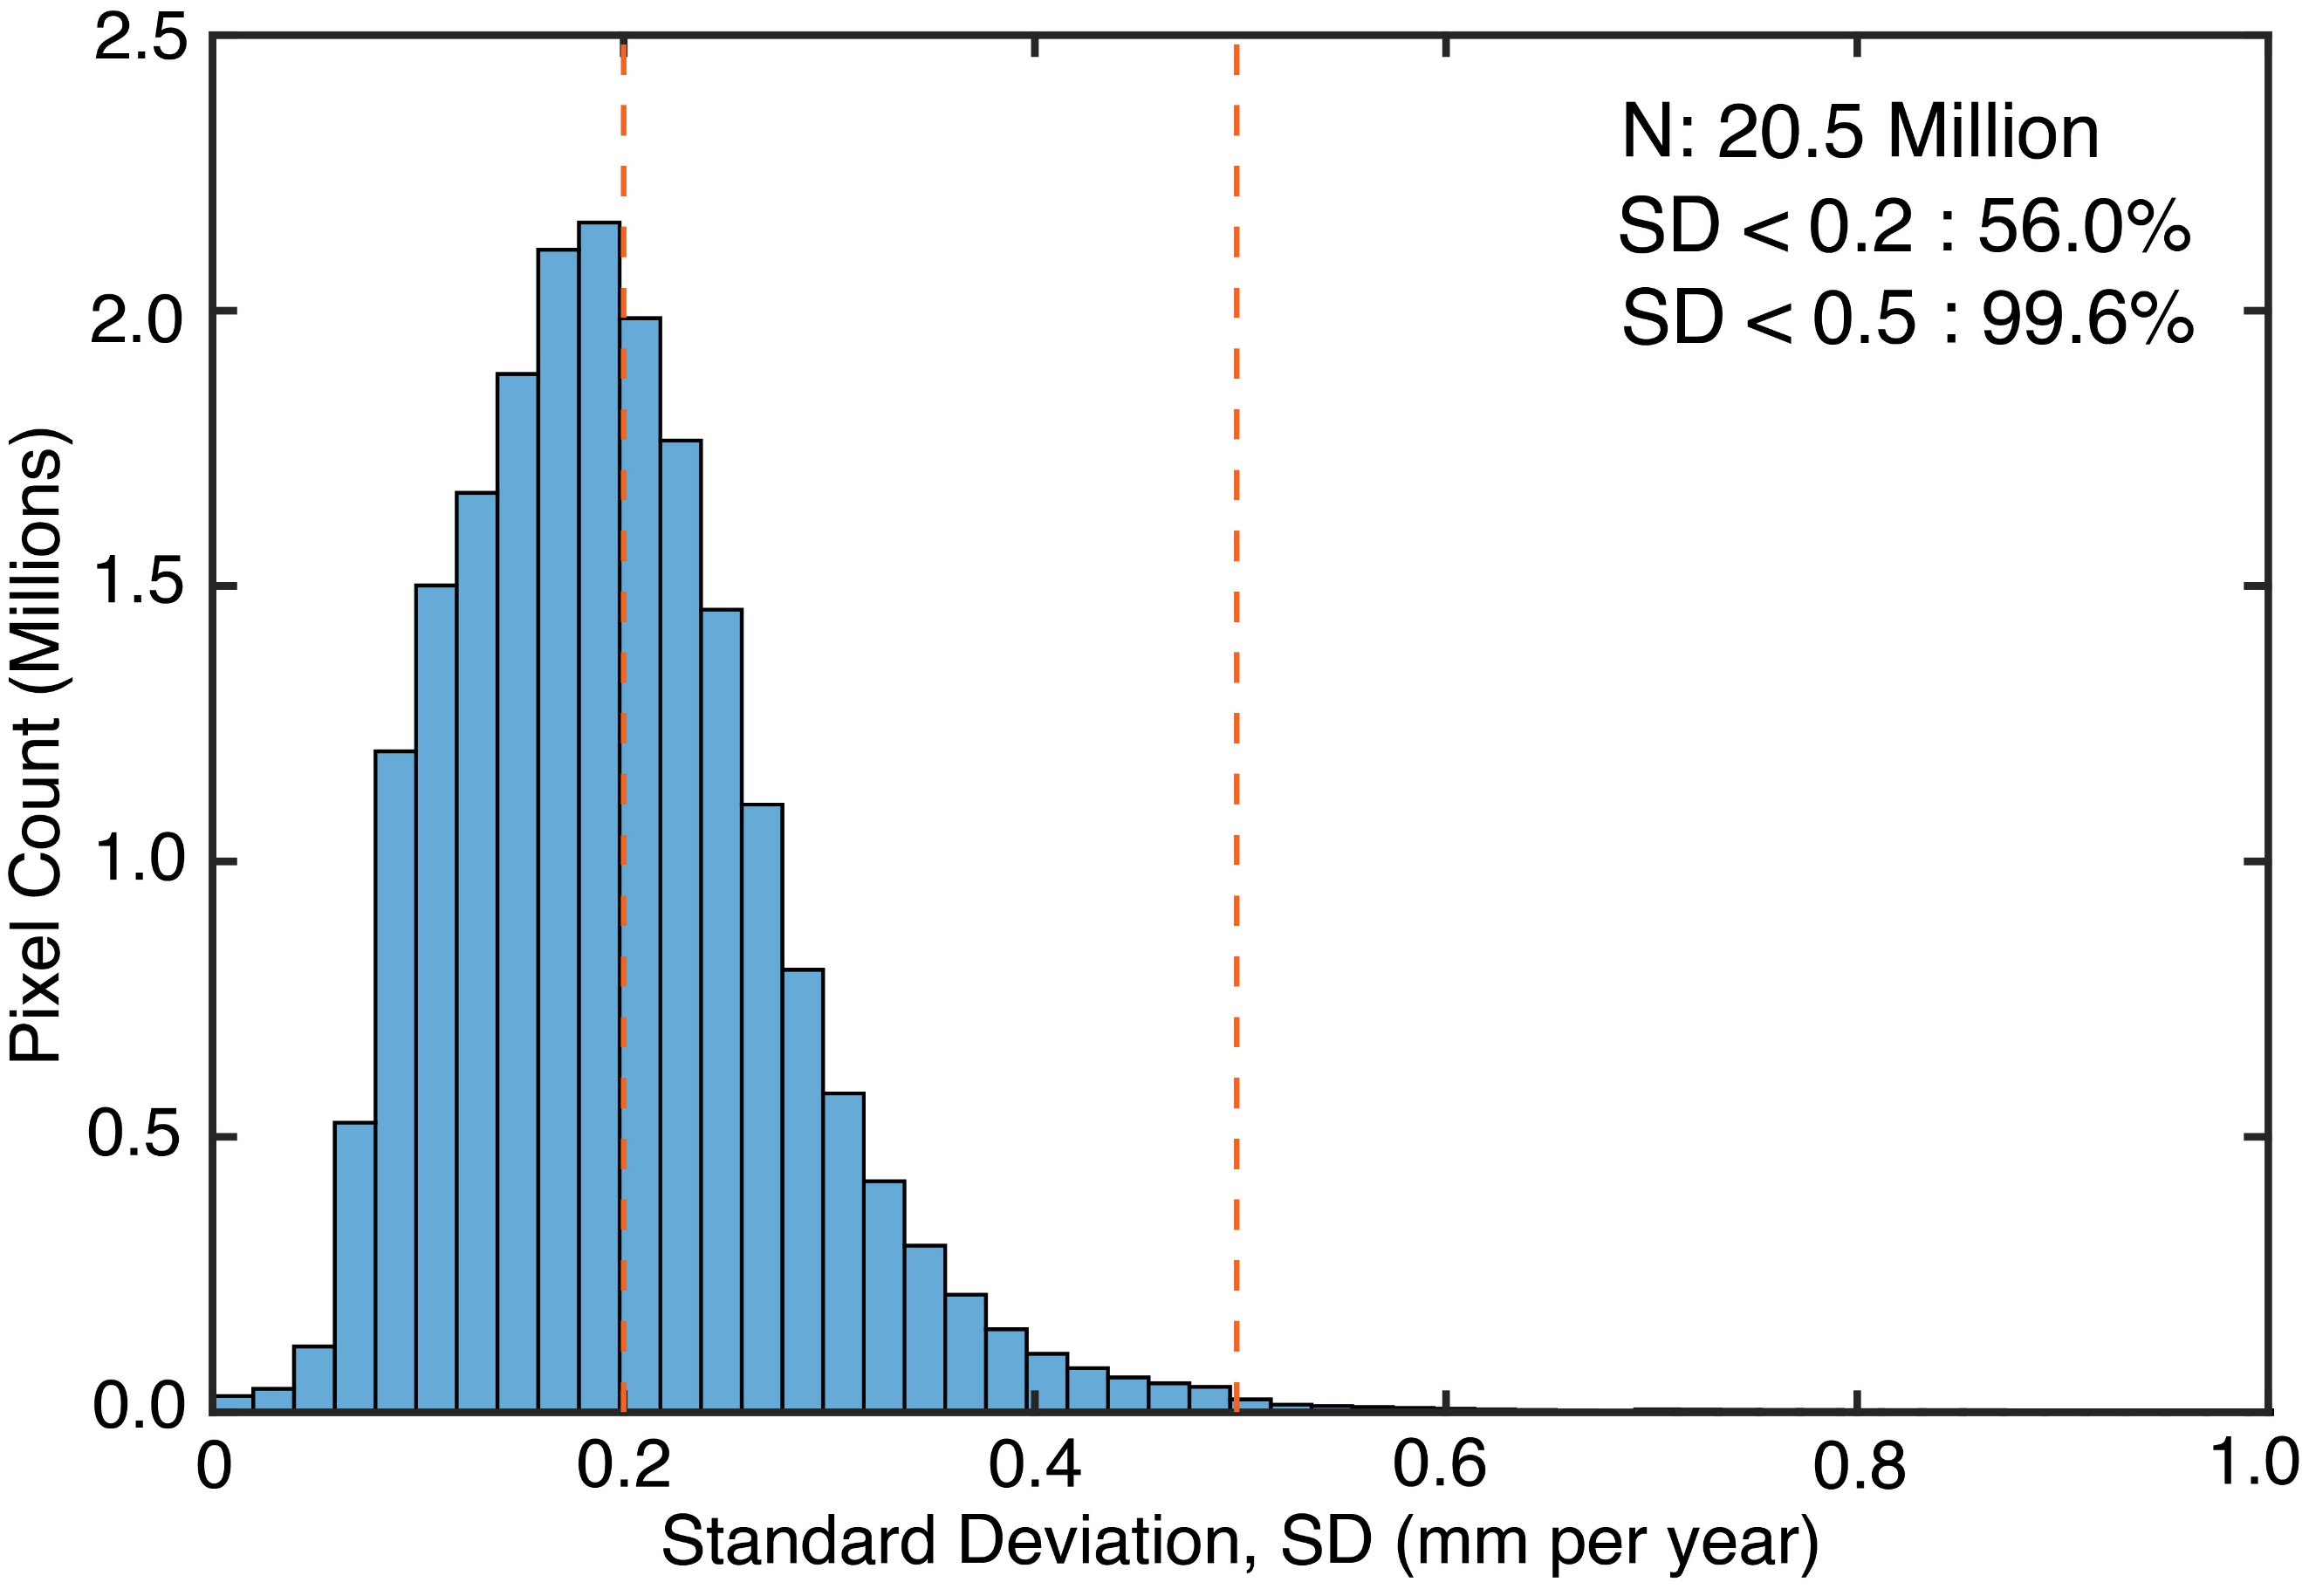


**Fig. 10. Distribution of Standard Deviation (SD) across the 40 Deltas.** Histogram showing the distribution of SD (mm per year). The dashed vertical lines indicate the SD thresholds of 0.2 mm per year and 0.5 mm per year. N is the total number of pixels across all deltas.


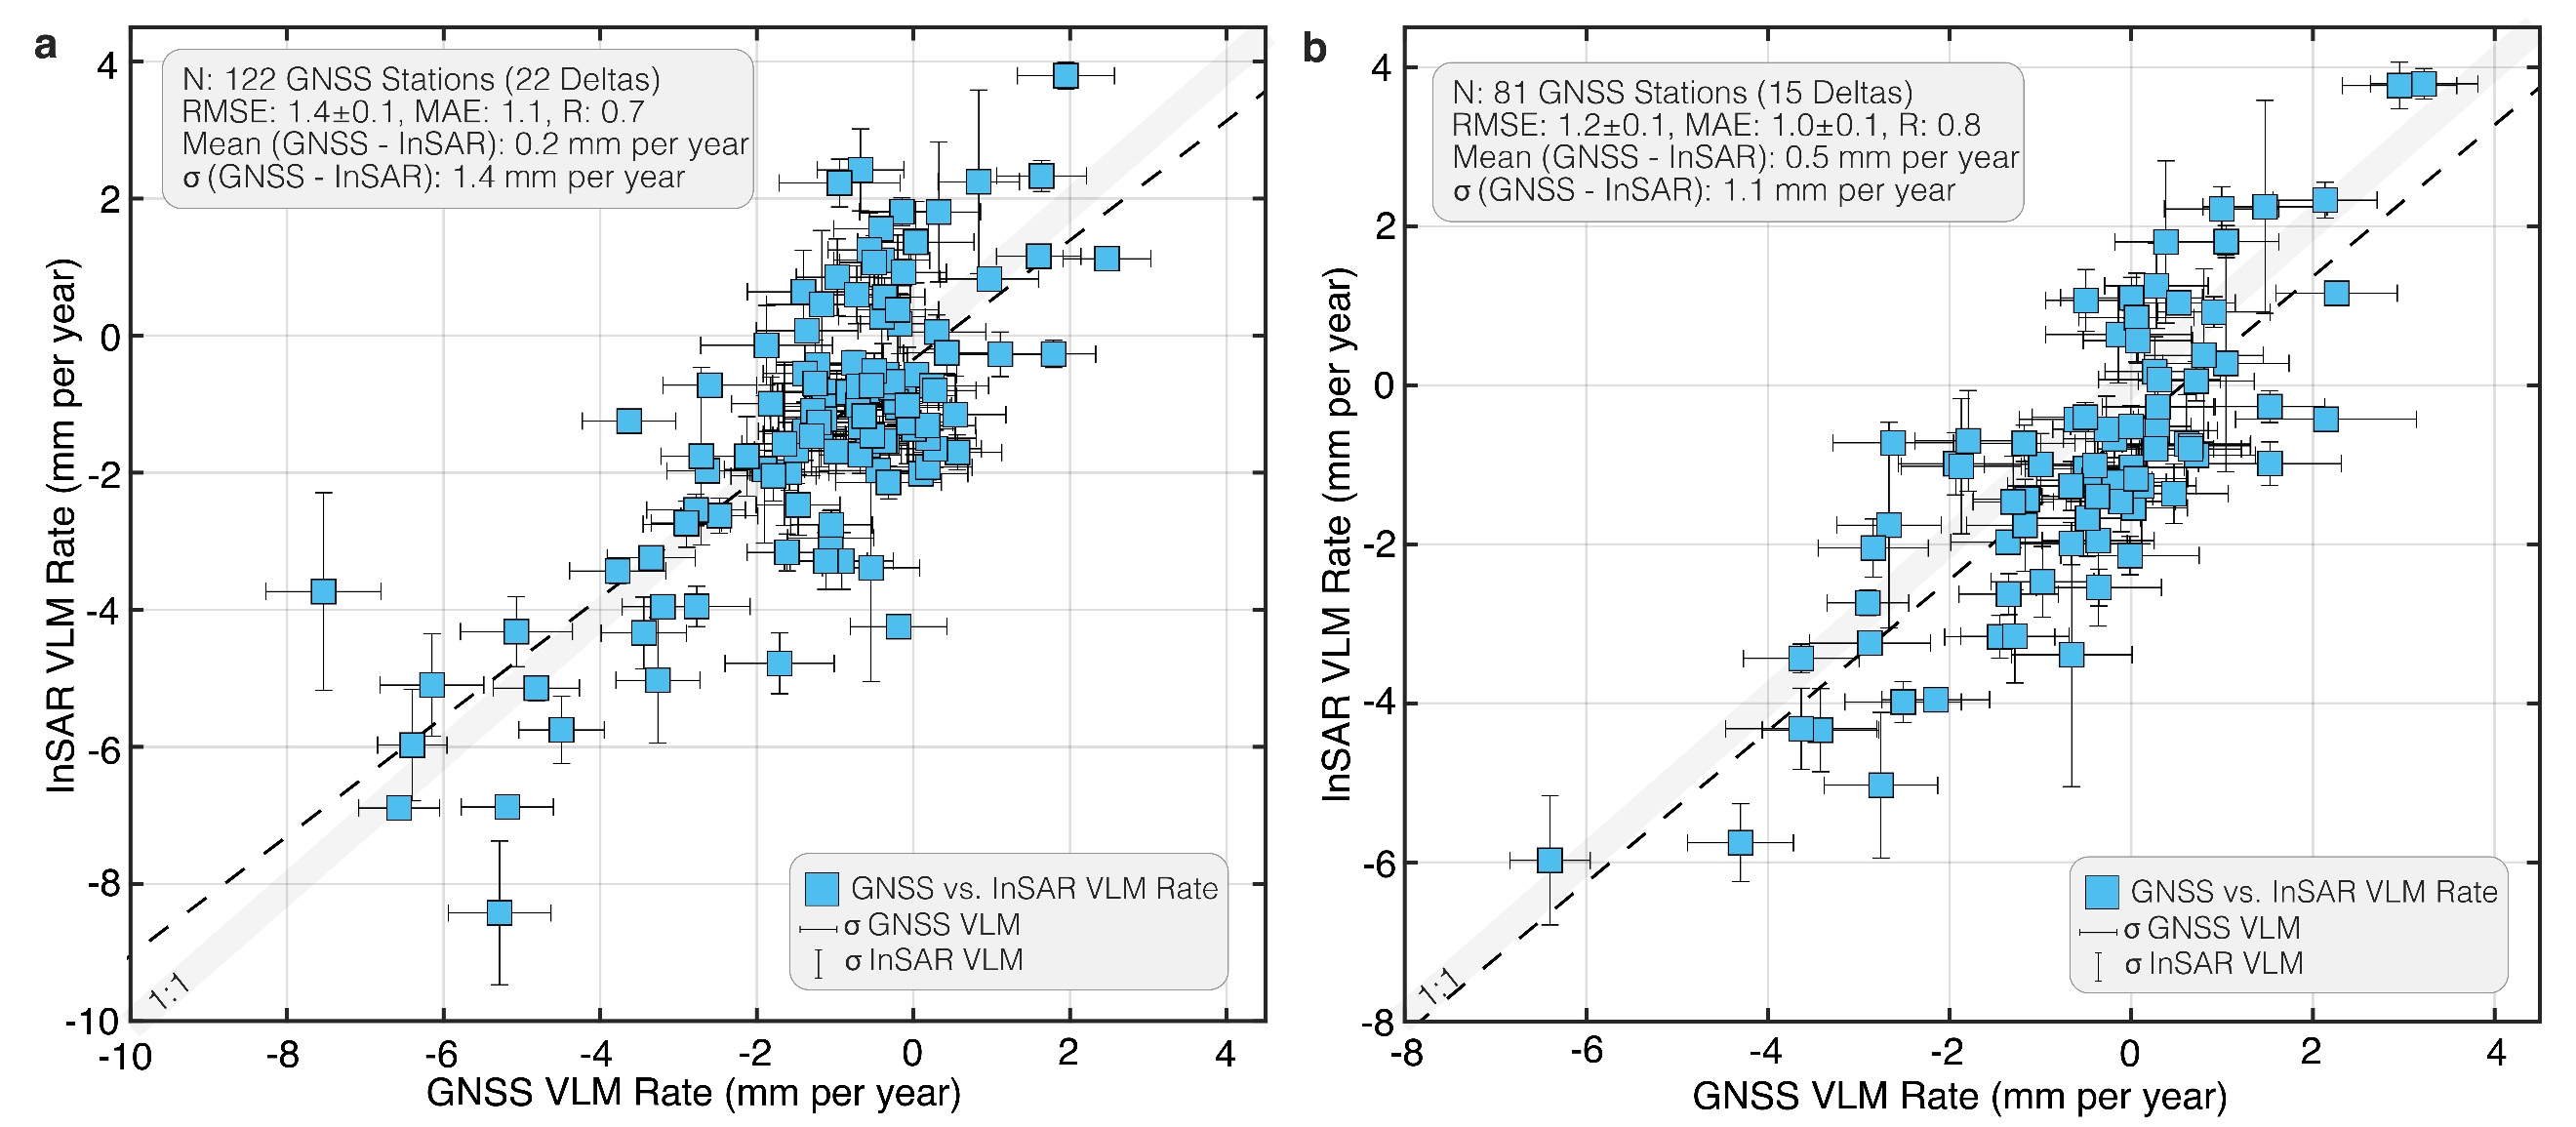


**Fig. 11. Validation of the Vertical Land Motion (VLM) rates across the 40 Deltas.** Bivariate plot comparing global navigation satellite system (GNSS) VLM rates with interferometric synthetic aperture radar (InSAR)-derived VLM rates using **(a)** historical long-term GNSS records, and **(b)** InSAR observation period (2014 – 2023).


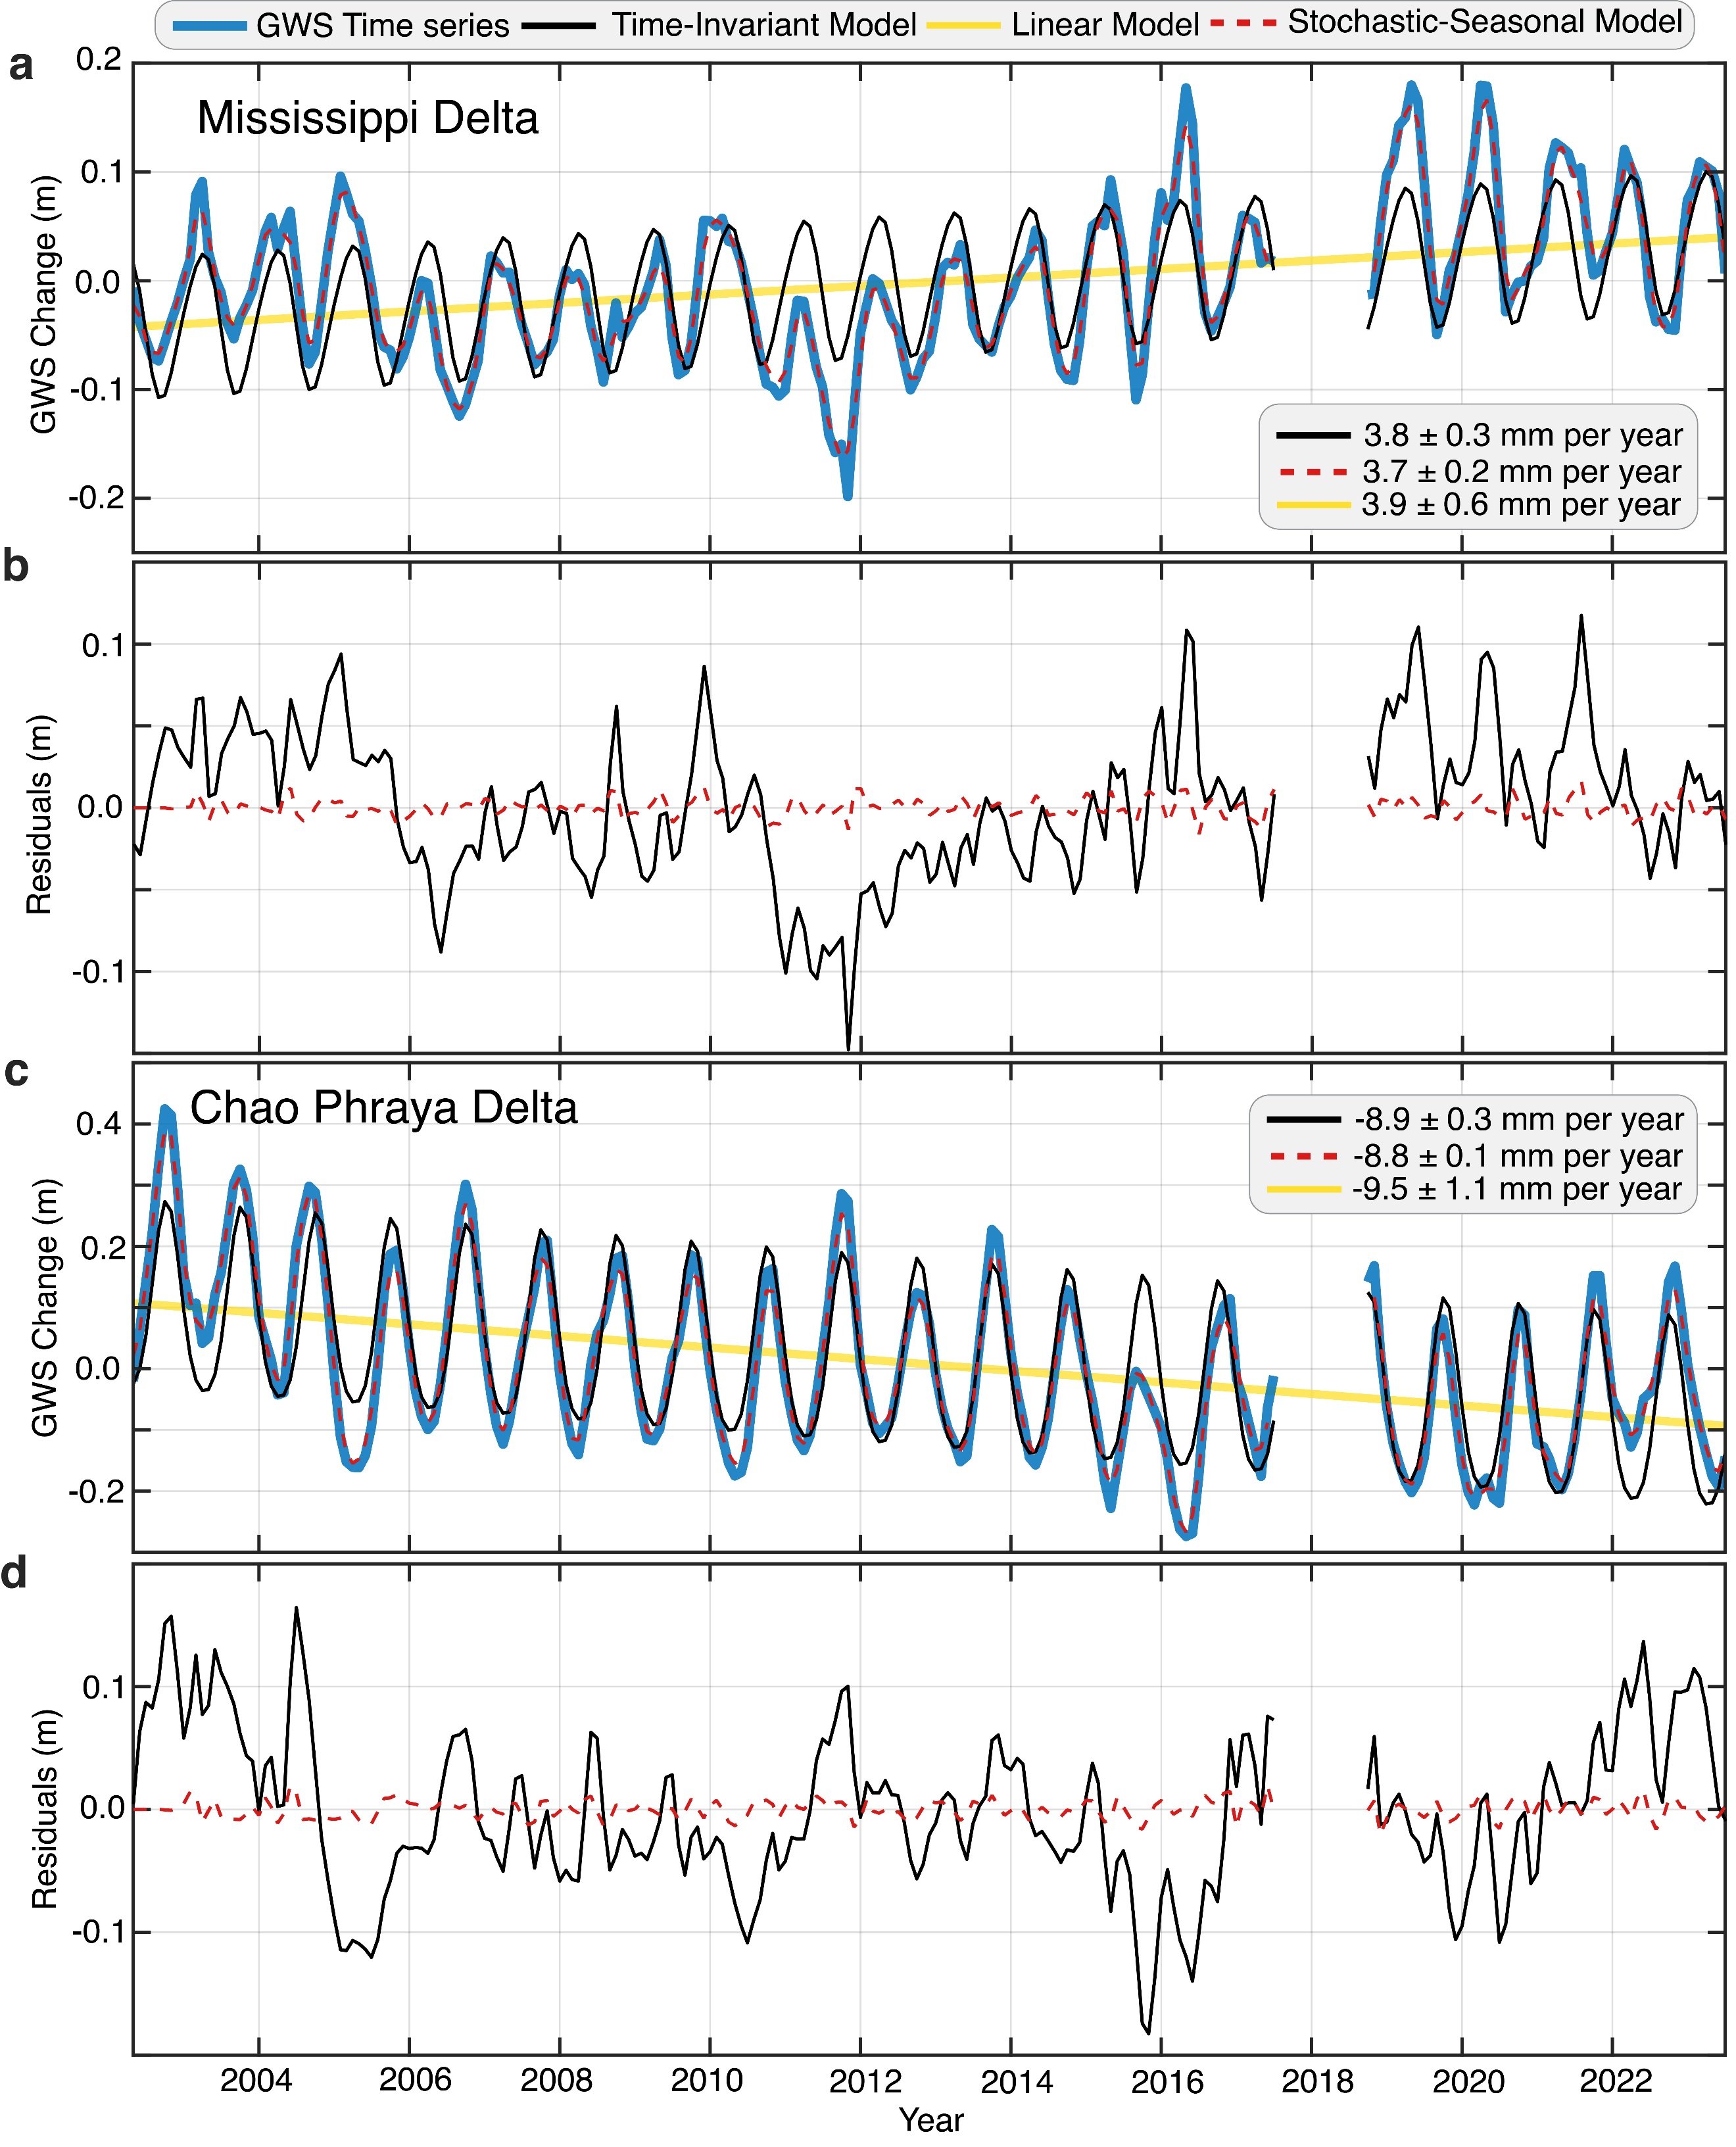


**Fig. 12. Comparison of Time-Invariant and Stochastic-Seasonal Models for Groundwater Storage Trends.** Time seriesof Gravity Recovery and Climate Experiment (GRACE)-derived groundwaterstorage (blue lines) for the **(a)** Mississippi and **(c)** Chao Phraya deltas, along with the time-invariant (black lines), linear (yellow lines), and stochastic-seasonal (red dashed lines) models. Residuals of the time-invariant and stochastic model for the **(b)** Mississippi and **(d)** Chao Phraya deltas.


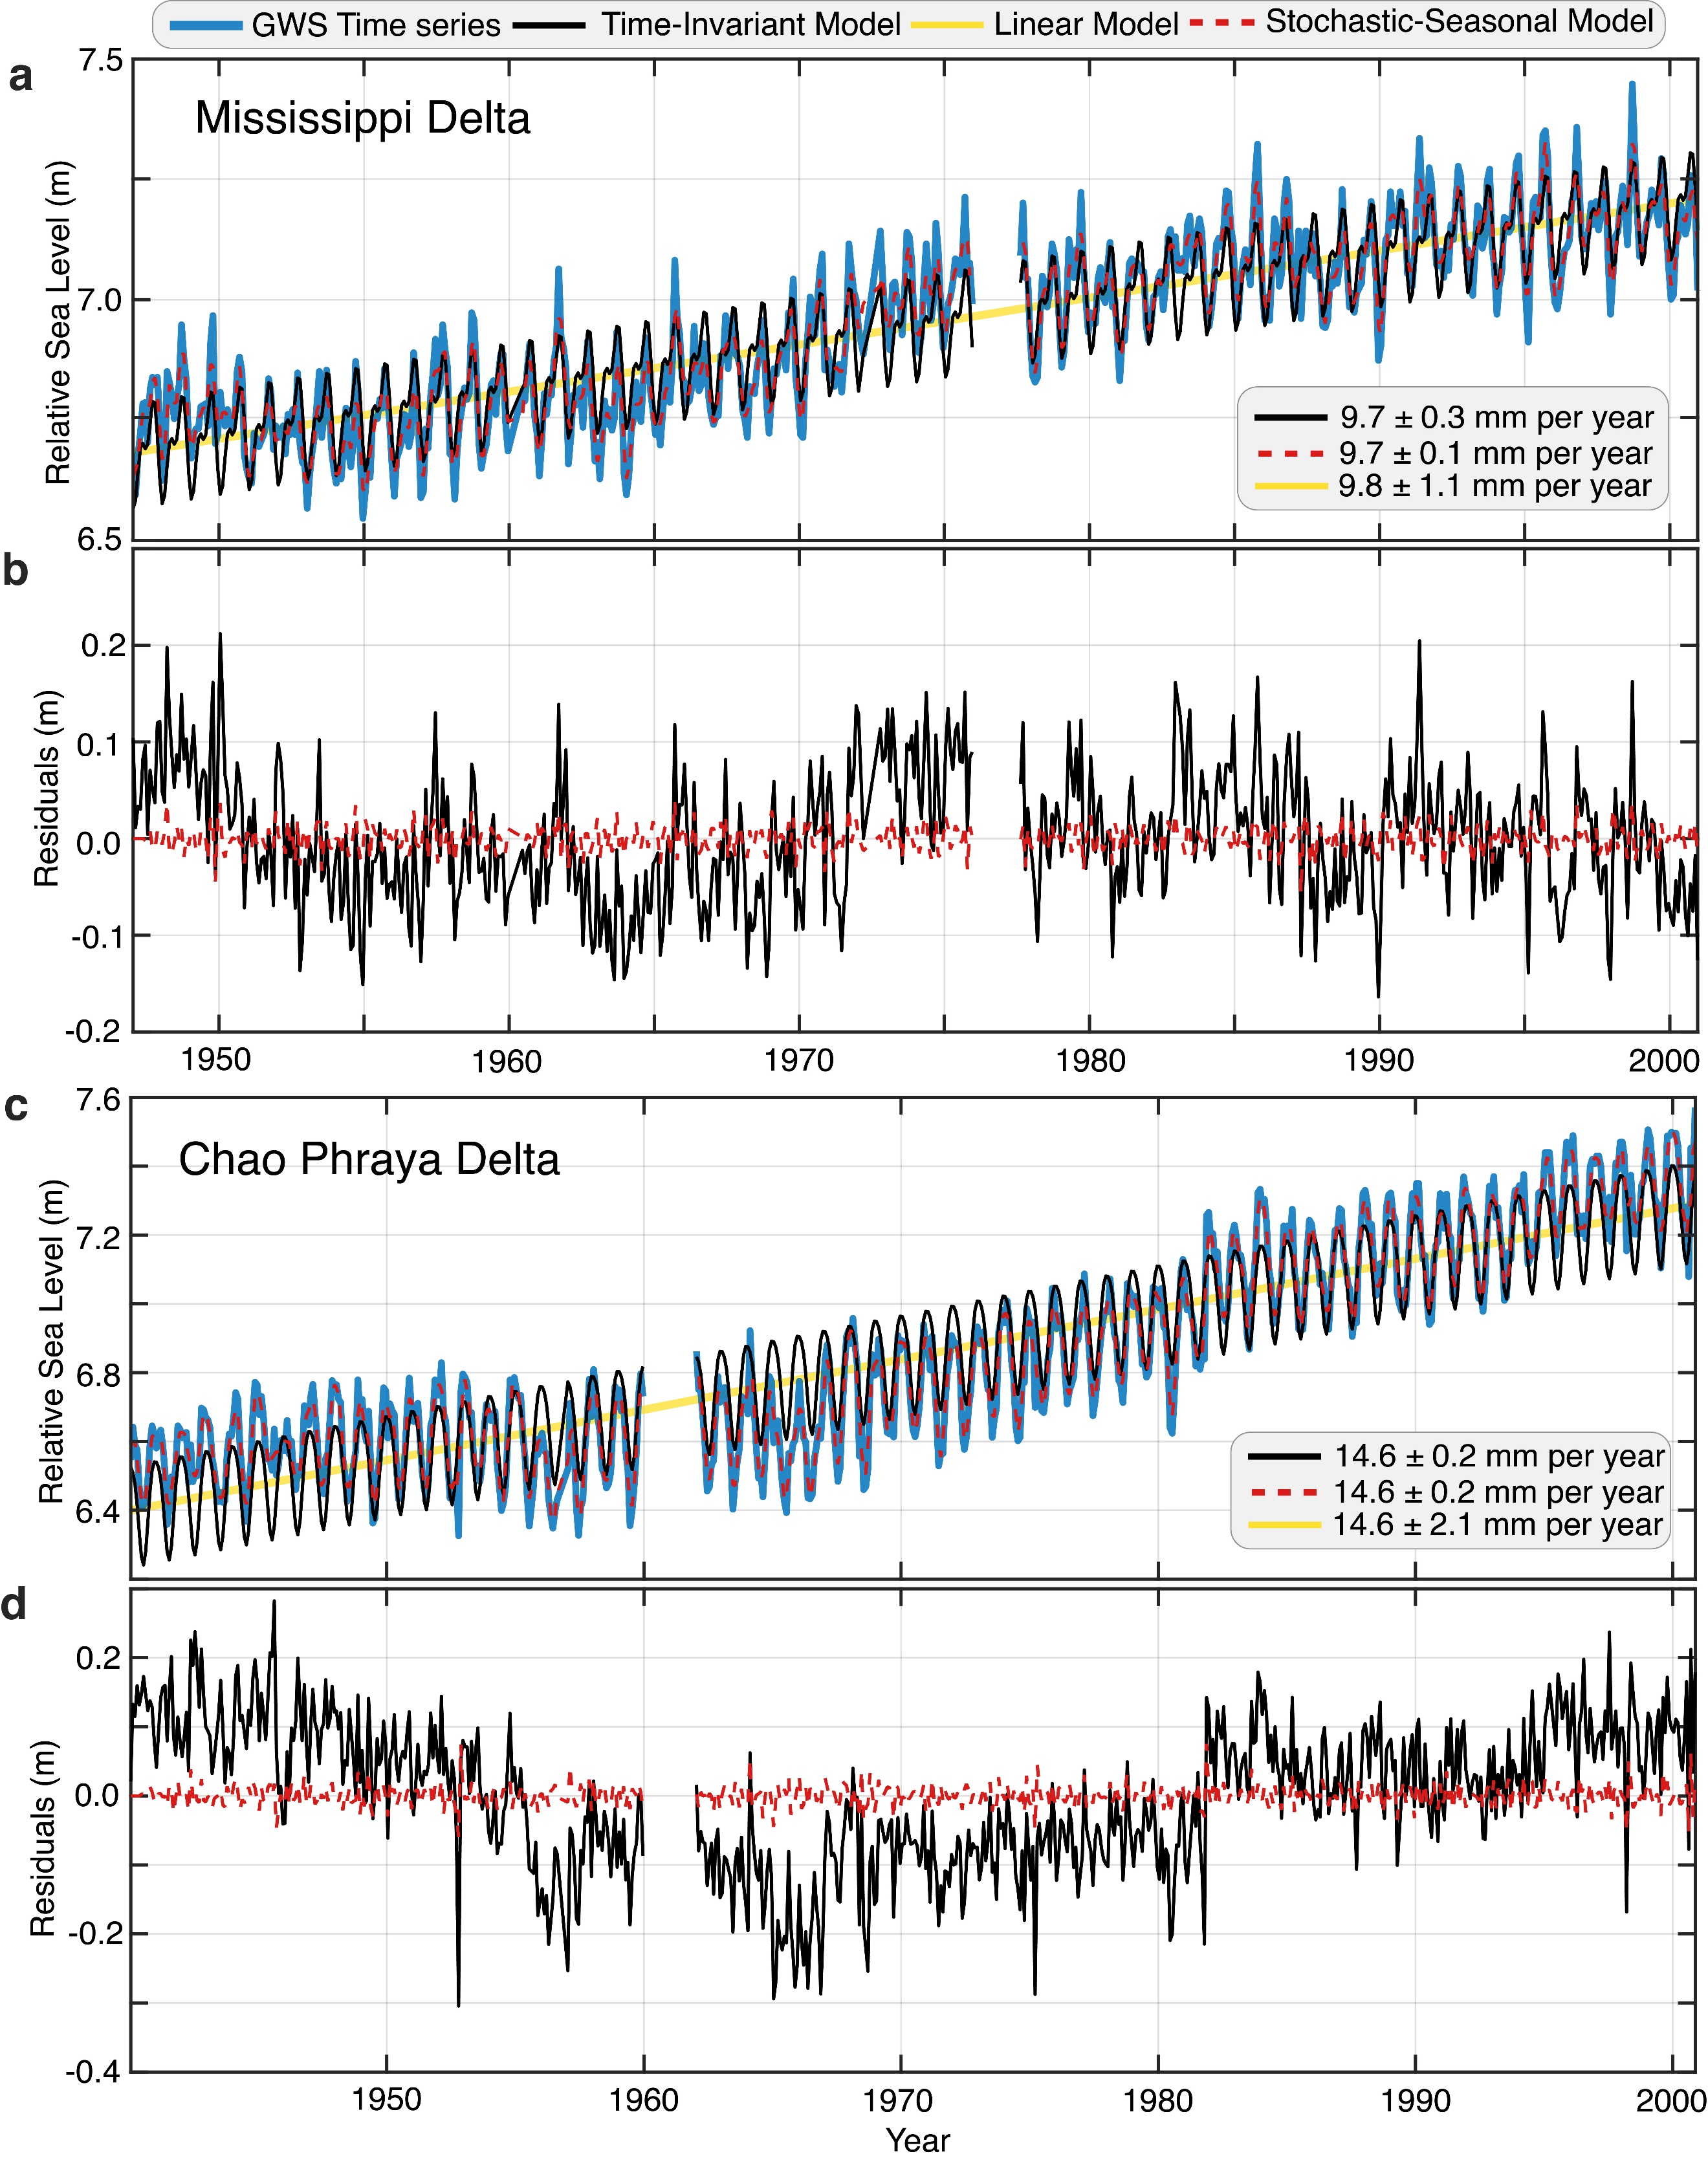


**Fig. 13. Comparison of Time-Invariant and Stochastic-Seasonal Models for Sea Level Trends.** Time seriesof 20th century relative sea levels from tide gauges (blue lines) for the **(a)** Mississippi and **(c)** Chao Phraya deltas, along with the time-invariant (black lines), linear (yellow lines), and stochastic-seasonal (red dashed lines) models. Residuals of the time-invariant and stochastic model for the **(b)** Mississippi and **(d)** Chao Phraya deltas.


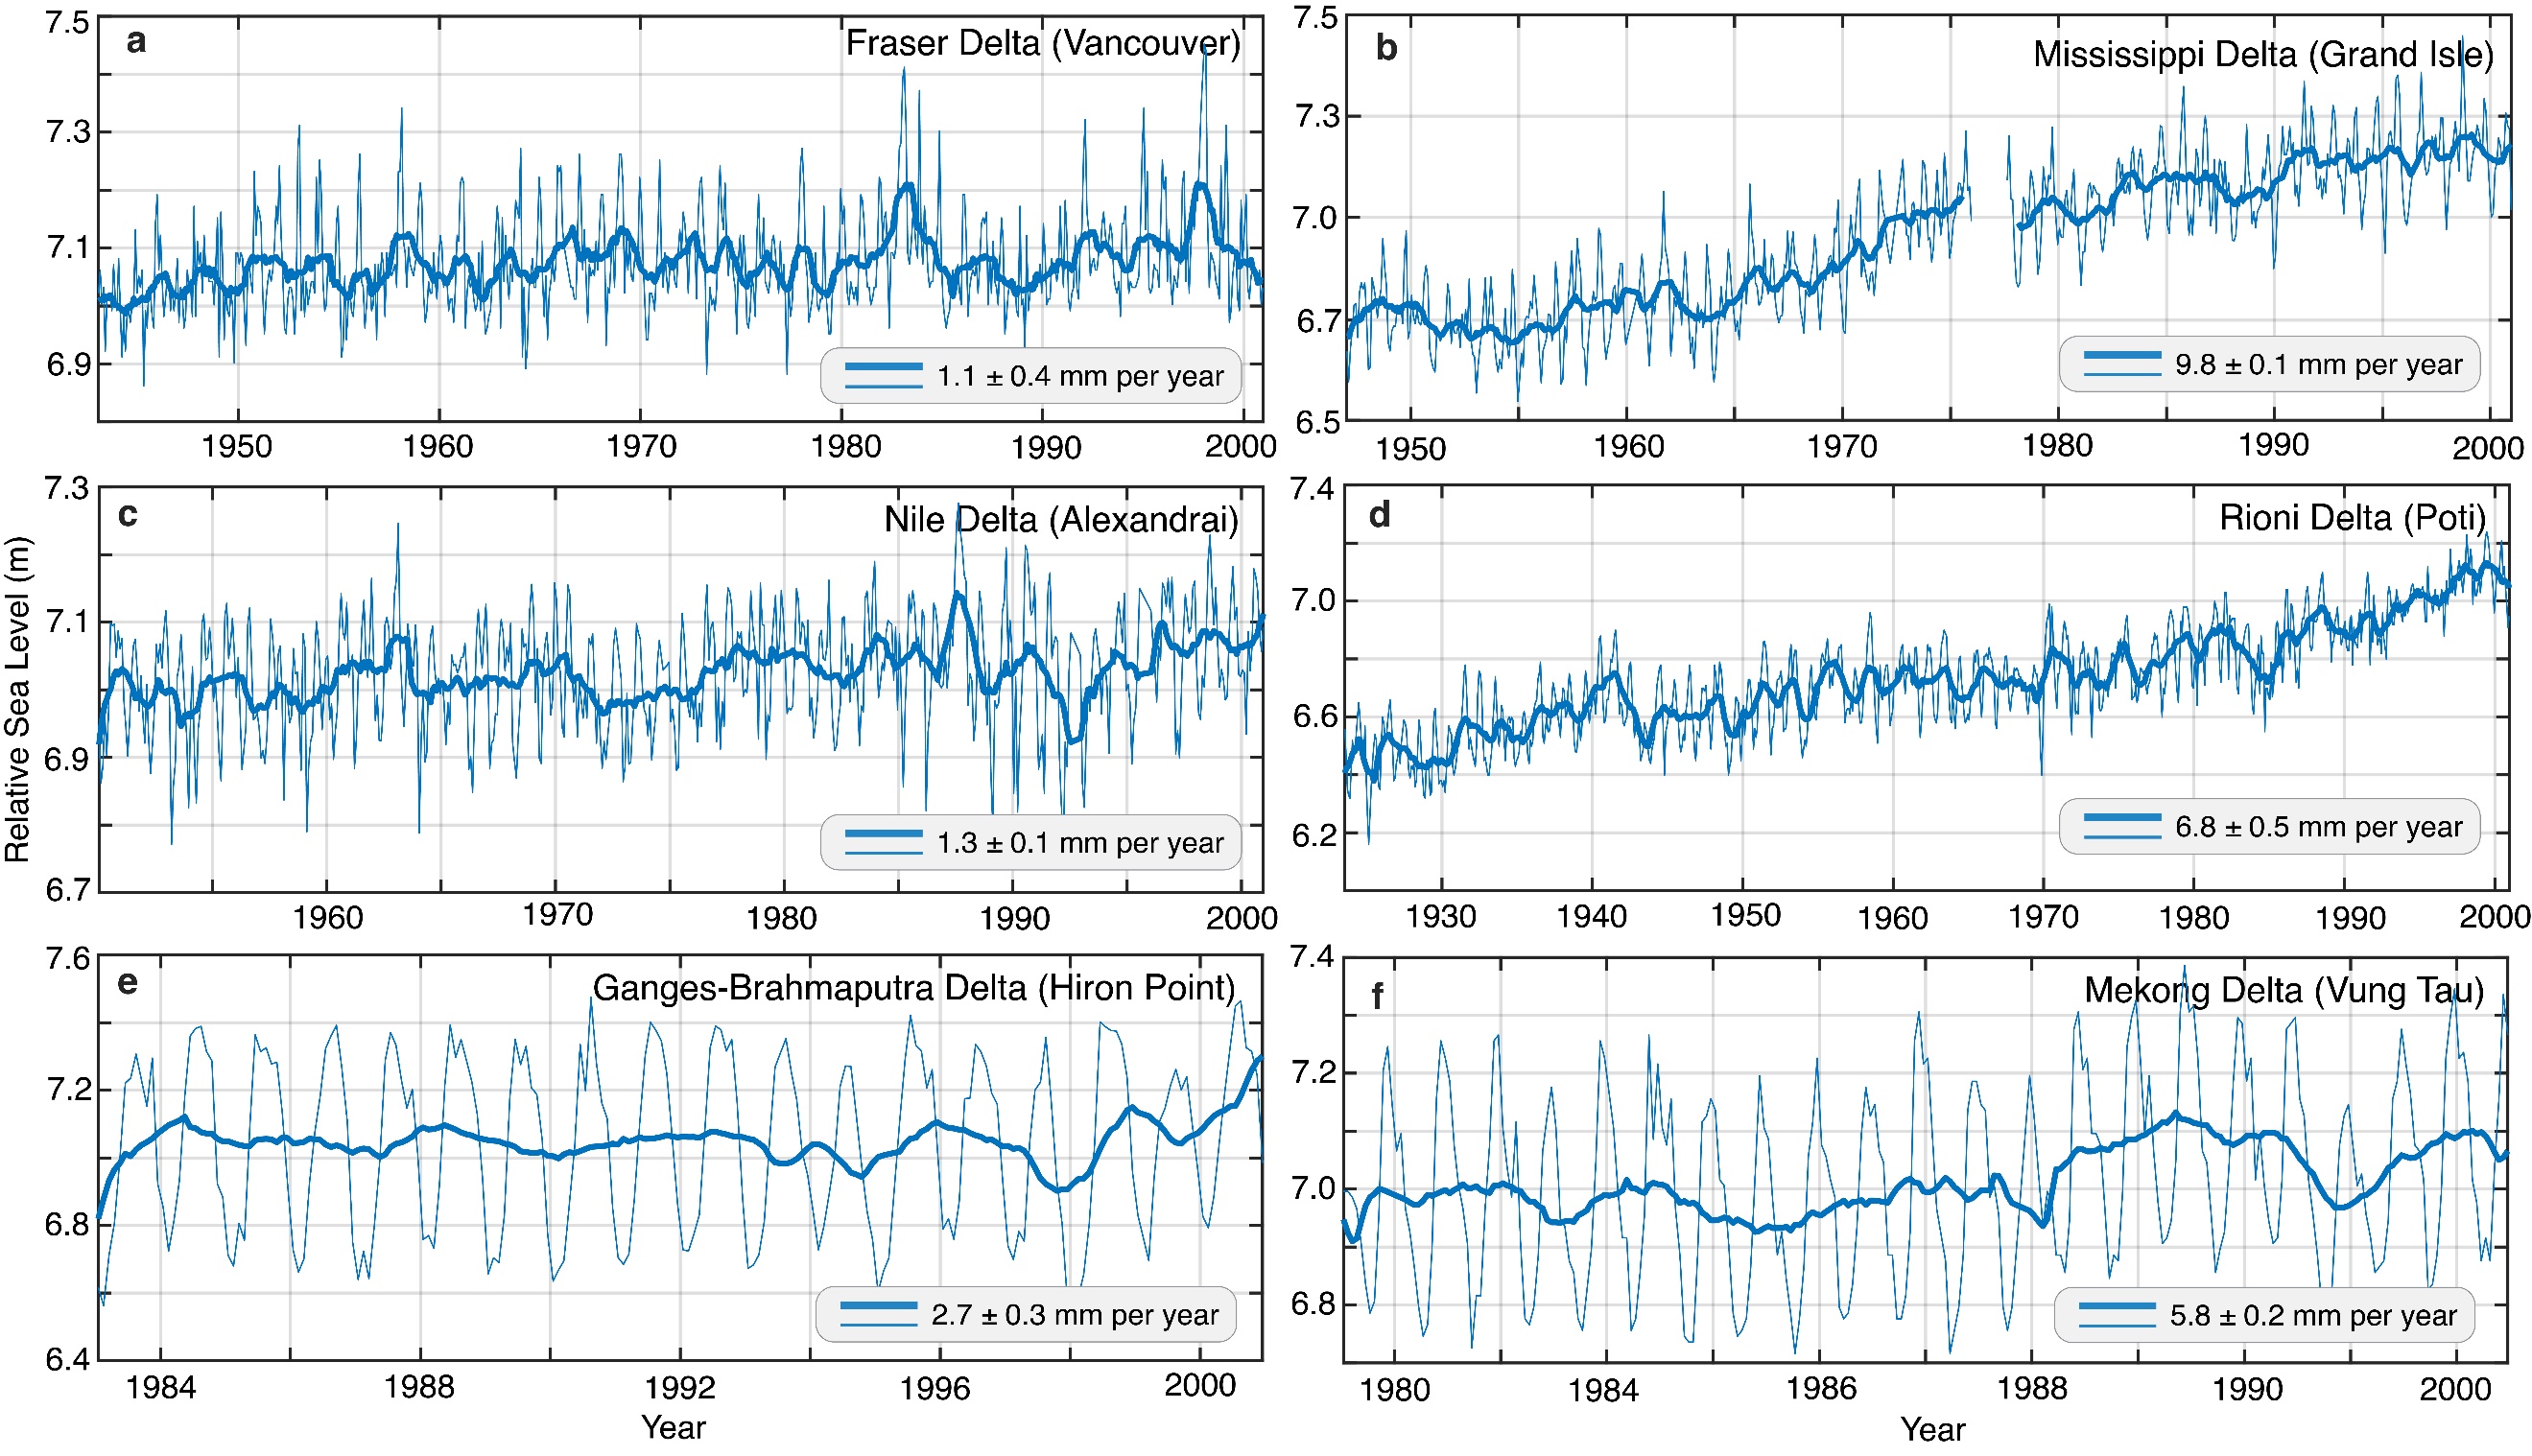


**Fig. 14. Relative Sea Level (RSL) for the 20th Century for six Representative Deltas.** Monthly (thin blue lines) and annual moving mean (thick solid blue lines) of RSL time series from tide gauges in the **(a)** Fraser, **(b)** Mississippi, **(c)** Nile, **(d)** Rioni, **(e)** Ganges-Brahmaputra, **(f)** Mekongdeltas. The relative sea level rise rates for all 40 deltas are summarized in Supplementary Table 1.


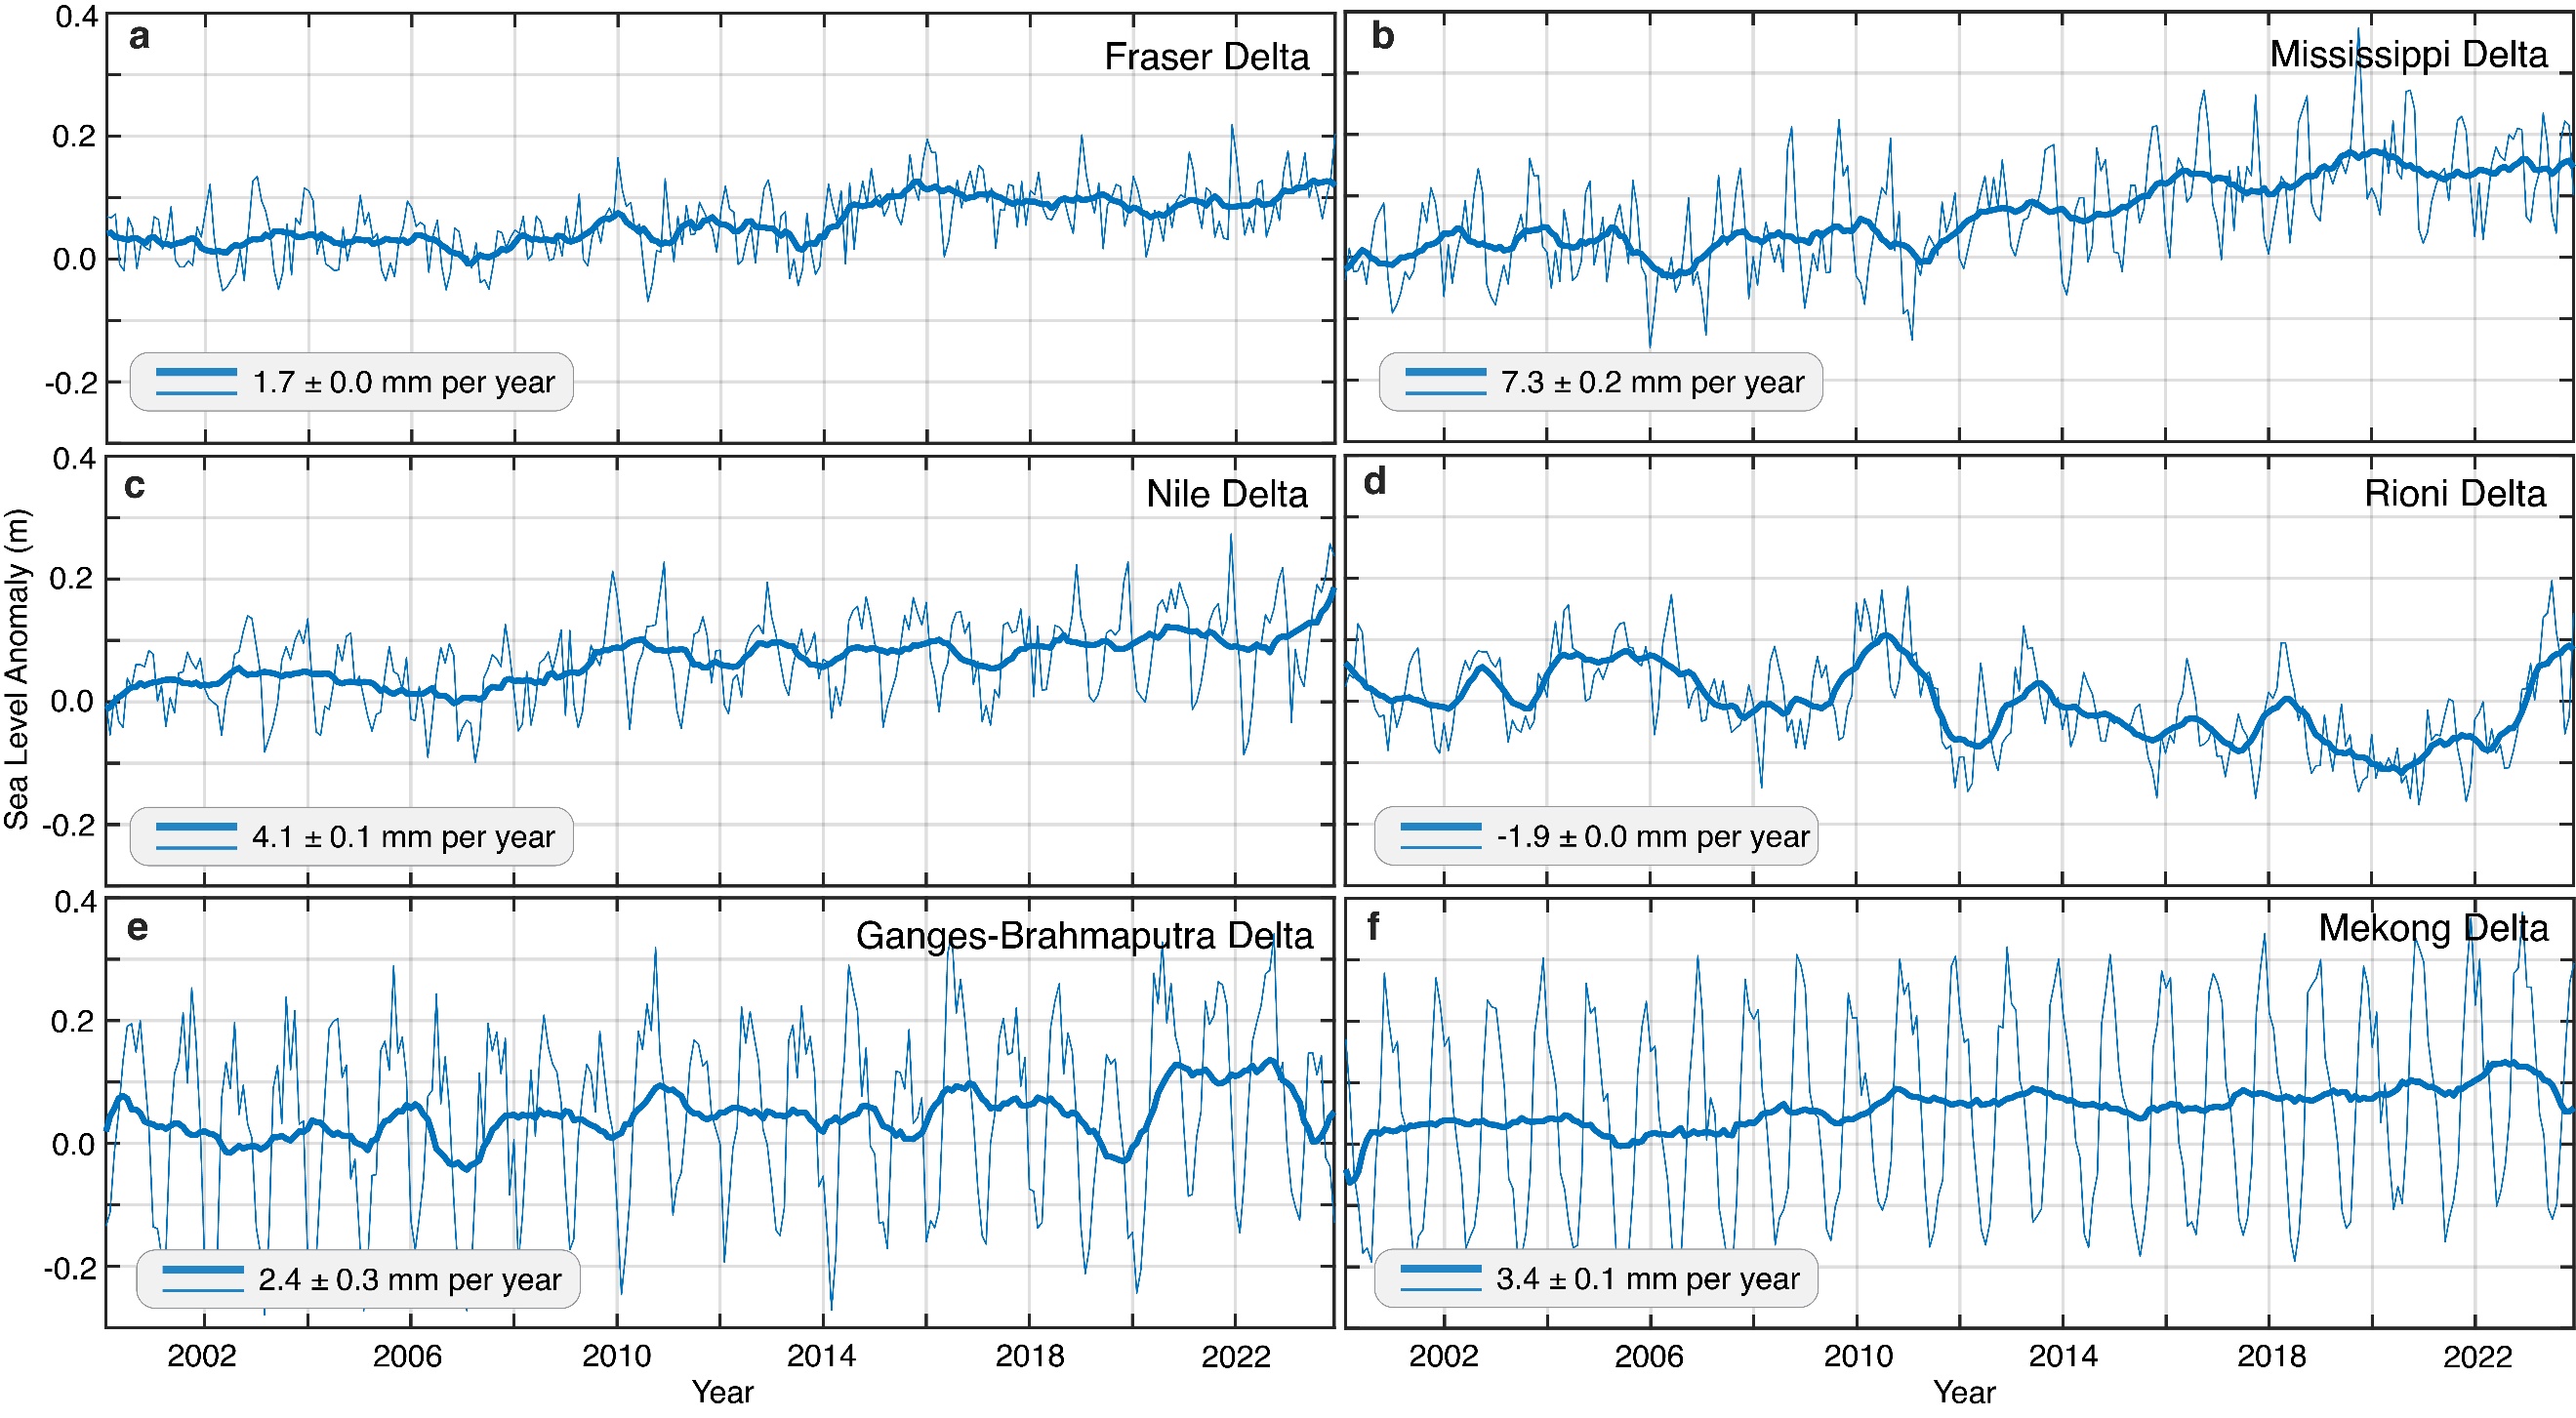


**Fig. 15. Sea Level Anomaly (SLA) for the 21st Century for Six 6 Representative Deltas.** Monthly (thin blue lines) and annual moving mean (thick solid blue lines) of SLA time series derived from satellite altimetry during 2001 to 2023 in the **(a)** Fraser, **(b)** Mississippi, **(c)** Nile, **(d)** Rioni, **(e)** Ganges-Brahmaputra, **(f)** Mekongdeltas. The sea level rates for all 40 deltas are summarized in Supplementary Table 1.

**Table 1. Land Subsidence, Sea Level Rise, Population, and the Notre Dame Global Adaptation Index (ND-GAIN) Adaptation Readiness Score for 40 Deltas.** This table summarizes the dataset analyzed in this study, including land subsidence, sea level rise (historical, present, and projected), population (total and population on low elevation areas), and ND-GAIN adaptation readiness scores for each delta. Details on dataset sources and processing methodologies can be found in the Methodology and Data Availability sections.

<See attached Excel sheet>

**Table 2. Anthropogenic Drivers of Subsidence in Deltas.** This table summarizes the dataset for groundwater storage rate (mm per year), sediment flux, urban fraction, and the Local Interpretable Model-Agnostic Explanations (LIME)-derived feature importance of each predictor across all deltas.

<See attached Excel sheet>

**Table 3. Synthetic Aperture Radar (SAR) Datasets for 40 Deltas.** This table summarizes the processed orbits, paths, and frames for each delta. Ascending and descending orbits were processed for 27 deltas, while either ascending or descending acquisitions were processed for 13 deltas.

<See attached Excel sheet>
