# Supplementary material for: The Global Threat of Sinking Deltas
Source: Research Square preprint supplement (doi:10.21203/rs.3.rs-6223150/v1), 2025-04-07
Supplement: Supplementary file 2 [file a168e9d6008dfa0f5f534c43.xlsx]

## Sheet: Table Description
Descriptions for supplementary tables
Table 1	Land Subsidence, Sea Level Rise, Population, and the Notre Dame Global Adaptation Index (ND-GAIN) Adaptation Readiness Score for 40 Deltas. This table summarizes the dataset analyzed in this study, including land subsidence, sea level rise (historical, present, and projected), population (total and population on low elevation areas), and ND-GAIN adaptation readiness scores for each delta. Details…
Table 2	Anthropogenic Drivers of Subsidence in Deltas. This table summarizes the dataset for groundwater storage rate (mm per year), sediment flux, urban fraction, and the Local Interpretable Model-Agnostic Explanations (LIME)-derived feature importance of each predictor across all deltas.
Table 3	Synthetic Aperture Radar (SAR) Datasets for 40 Deltas. This table summarizes the processed orbits, paths, and frames for each delta. Ascending and descending orbits were processed for 27 deltas, while either ascending or descending acquisitions were processed for 13 deltas.

## Sheet: Table 1
S/N	Delta Names	Mean (mm/yr)	Median (mm/year)	Area-weighted average (mm/yr)	Standard deviation, STD (mm/yr)	Mean VLM (mm/yr) for Elevation < 1m	Maximum subsidence (mm/yr)	95th Percentile Subsidence (mm/yr)	20th century relative SLR		Current (2001 - 2023) 21st century absolute (geocentric) SLR		Current 21st century relative SLR (mm/yr)	Projected 21st century absolute (geocentric) SLR rate (mm/yr)		Area Exposure (%)							Delta Population				ND-GAIN
									Rate (mm/yr)	STD (mm/yr)	Rate (mm/yr)	STD (mm/yr)		Year 2050	Year 2100	VLM (mm/yr) ≥ 0	0 > VLM (mm/yr) ≤ -3	-3 > VLM (mm/yr) ≤ -5	-5 > VLM (mm/yr) ≤ -10	VLM (mm/yr) < -10	Subsidence rate > absolute SLR	Subsidence rate > global SLR	Total population	Population on elevation <1m	Population on land (susidence>absolute SLR)	Population on land (susidence>global SLR)	Year 2000	Year 2022
1	Rio Grande	-1.65488	-1.54473	-1.37134	1.91094	-2.41728	-16.9781	-4.90312	3.49415	0.1923	6.82028	0.0914823	8.47516	7.3	12.8	17.1338	60.3933	17.9297	4.51583	0.0273801	0.733581	10.9121	1.79773e+06	4277.14	5707.59	97102.6	0.531291	0.535096
2	Mississippi	-3.33001	-3.29759	-3.2525	1.66444	-2.94489	-11.518	-6.17783	6.22388	0.830727	7.30579	0.233229	10.6358	7.4	12.4	2.32774	39.9168	43.2402	14.4584	0.0568626	1.51472	32.5988	2001943	754022	31587.1	492194	0.632292	0.651191
3	Amazon	-2.22619	-1.82197	-1.90296	2.59575	-4.53587	-24.9649	-7.20761	-0.457636	0.140165	1.99562	0.265862	4.22182	7.7	13.2	14.5195	55.6163	16.9101	11.8248	1.12932	46.3687	19.5067	4640502	153753	2191697	1.0719e+06	0.360645	0.35396
4	Senegal	-1.72802	-1.5065	-1.24977	3.49279	-3.9609	-26.7213	-8.012			3.63464	0.0114801	5.36266	7.4	12.8	27.6762	43.1637	15.6452	11.0034	2.51148	22.753	19.7441	615291	194916	223624	196438	0.340366	0.351225
5	Saloum	-1.39696	-1.18631	-1.01531	2.79562	-1.81373	-15.4807	-6.4192			2.20398	0.0126137	3.60094	7.5	13	27.3198	49.484	13.5407	9.09992	0.555579	32.5704	14.9516	469199	210098	282095	164873	0.340366	0.351225
6	Volta	-1.03053	-0.837941	-0.717047	1.80454	-2.31596	-16.143	-4.19798			5.27339	0.00758765	6.30392	7.8	13.4	30.4198	55.5769	11.7565	2.19477	0.0519902	1.69275	5.99452	725939	128433	27545	92092.6	0.341406	0.347962
7	Niger	-3.43592	-3.20961	-3.35394	2.12817	-4.34231	-31.4934	-7.11486			4.87531	0.0280145	8.31124	7.9	13.6	2.3862	42.6228	37.1882	16.7262	1.07662	19.2574	32.7529	13920134	3.55021e+06	4.53889e+06	6.27342e+06	0.291206	0.250636
8	Cross River	-3.22547	-3.05734	-3.18556	1.95609	-4.36794	-28.0432	-6.38675			4.16991	0.00631001	7.39538	7.8	13.6	1.23738	47.2833	36.9176	14.0243	0.537467	26.3549	29.5348	1919532	284305	750135	799358	0.291206	0.250636
9	Wouri	-2.62215	-2.39971	-2.56312	1.81223	-3.71409	-17.6781	-5.63525			4.08325	0.00715164	6.7054	7.8	13.6	2.25102	64.7263	26.3891	5.7979	0.83576	12.6281	13.6357	3.84801e+06	1.19298e+06	1.17974e+06	1229689	0.276735	0.262503
10	Nile	-6.72514	-6.48753	-6.66582	2.77847	-8.4479	-47.5175	-11.2357	1.32131	0.0833053	4.11567	0.0826913	10.8408	7.2	12.6	0.881995	4.44313	14.2944	72.2696	8.11093	90.1117	90.8738	56602180	7552206	39568584	39838472	0.348993	0.34806
11	Rhone	-3.01097	-2.4401	-2.84832	2.54664	-5.00058	-14.6684	-8.03144			3.29418	0.0270678	6.30515	6.6	11.4	5.4019	53.1856	20.5965	19.6186	1.19735	37.4692	29.5154	219511	37008.6	52021.9	41310.3	0.588792	0.654165
12	Rhine	-2.66849	-2.43282	-2.6536	1.57093	-3.96919	-18.264	-5.52414	2.34603	0.842661	4.0384	0.0632539	6.70689	7.3	11.9	0.557778	61.944	29.0296	8.41186	0.0567928	19.3083	19.8753	4.21596e+06	2.17684e+06	610818	633462	0.633611	0.676022
13	Po	-6.06164	-5.9901	-6.06164	1.58597	-6.82526	-17.5622	-8.75879			2.42944	0.0222962	8.49108	6.3	11.3	0	1.41823	24.5702	72.5412	1.47038	99.7202	91.3984	158269	96950.3	116824	103093	0.494927	0.532319
14	Vistula	-5.46957	-5.38484	-5.46148	1.99314	-6.41455	-13.7846	-8.82973	2.93824	0.153636	3.25729	0.03354	8.72686	7.4	12.2	0.147944	9.20289	33.5476	55.8173	1.28427	87.8869	75.6273	1.11546e+06	166705	786057	545279	0.452654	0.534278
15	Neva	-0.187894	0.0915885	-0.086554	1.33701	-2.88931	-12.6639	-2.55432			1.05	0.00358374	1.23789	7.2	10.4	53.9347	42.3724	2.65131	0.880358	0.161228	17.0109	1.87076	4313861	61219.3	766190	114509	0.416706	0.499782
16	Ceyhan/Seyhan	-4.1165	-4.03948	-3.82172	2.99104	-2.86975	-17.4317	-9.10278			3.9407	0.0458262	8.05719	6.8	12	7.16093	29.3504	26.3031	34.0921	3.09337	51.3022	50.544	355023	14998.1	117666	116255	0.352125	0.486581
17	Rioni	-0.275761	-0.0973681	-0.144799	1.62993	-1.4454	-20.4755	-3.17357	6.7713	0.5321	-1.88357	0.040546	-1.60781	6.1	10.6	47.4914	46.5355	5.3713	0.567138	0.0346405	93.5315	2.04621	288243	14862.7	280145	12833.9	0.347709	0.572943
18	Kabani	-0.66695	-0.232313	-0.371167	2.93747	-4.3575	-25.5712	-5.9968			5.57428	0.0245369	6.24123	7.3	13.7	44.3487	44.7028	4.71804	4.14273	2.0877	5.49704	7.8971	6778661	1.8929e+06	725735	1.04189e+06	0.36388	0.394955
19	Cauvery	-3.69687	-3.54221	-3.37993	3.15003	-6.28267	-35.9521	-8.48639			4.66343	0.0581116	8.36031	7	13.4	8.57312	32.0904	32.7232	23.5895	3.02373	31.2387	42.1393	6145338	348267	2.3805e+06	3.16236e+06	0.36388	0.394955
20	Brahmani	-6.45311	-6.4244	-6.45185	1.9583	-7.20503	-14.5819	-9.7551			2.48033	0.0926116	8.93344	6.6	12.8	0.0194541	3.72457	19.1485	73.2128	3.89471	98.0896	89.5974	3.91873e+06	119061	3538788	3.44941e+06	0.36388	0.394955
21	Mahanadi	-6.17843	-6.05212	-6.17011	2.22513	-7.22009	-20.4245	-10.064			3.90978	0.0705639	10.0882	6.6	13	0.134666	6.25004	24.2519	64.1264	5.23706	85.1675	84.1031	6248210	536563	5.56796e+06	5514734	0.36388	0.394955
22	Ganges–Brahmaputra	-3.94387	-3.26284	-3.60216	3.63578	-5.66756	-54.9415	-10.7115	5.08227	1.71051	2.3793	0.280246	6.32317	6.4	12.7	8.66441	37.7273	23.855	23.5426	6.21071	68.3407	40.4926	135383728	10752898	73972840	50751124	0.342578	0.319884
23	Irrawaddy (Ayeyarwady)	-3.14244	-2.65521	-2.61437	4.98766	-4.13779	-77.1018	-9.04285			5.25823	0.152009	8.40067	6.8	13.4	16.8046	38.3537	24.7694	15.8394	4.233	17.8467	30.9913	15033810	1.69147e+06	3.31401e+06	4738317	0.237323	0.25205
24	Chao Phraya	-8.81155	-8.06241	-8.80964	3.4507	-10.9024	-37.318	-15.3248	14.5682	0.147257	3.48155	0.0675073	12.2931	6.8	13.3	0.0216199	0.102572	5.95911	66.5883	27.3284	99.6687	98.9217	25292754	13736966	22636566	22506478	0.414553	0.489771
25	Mekong	-6.1065	-5.10501	-5.80714	5.06186	-6.22578	-50.4481	-15.9138	5.74737	0.160958	3.3949	0.121131	9.50141	7	13.5	4.90235	22.9804	21.052	34.4378	16.6275	67.9818	61.5255	24265902	12282988	12524587	11463338	0.346003	0.431797
26	Pearl	-3.46251	-2.70399	-3.14429	3.9485	-8.82657	-112.991	-10.1074	0.313983	0.111666	3.13436	0.0585718	6.59687	7.4	13.6	9.19037	45.6686	23.1063	16.9039	5.13079	43.0351	31.3554	44927968	2.66991e+06	16653453	11390108	0.362961	0.557007
27	Yangtze	-1.81553	-1.39126	-1.50953	2.64977	-3.11325	-38.2152	-5.86965	3.59516	0.154646	2.19501	0.21396	4.01053	7.6	13.8	16.8544	63.8869	12.1866	5.45132	1.62079	45.4486	11.4154	76254976	7.32469e+06	41307440	10280724	0.362961	0.557007
28	Chikuma-gawa	-2.58298	-1.85005	-2.38689	2.90653	-3.34368	-25.2145	-8.34197	0.307461	0.164607	4.77231	0.0547149	7.35529	8	14.3	7.59148	63.1812	16.5222	9.25724	3.44783	13.8655	18.9321	1.59296e+06	460702	310035	406323	0.592943	0.690446
29	Ciliwung	-5.6446	-3.39684	-4.7959	9.64164	-6.61552	-96.4081	-22.9935			4.51481	0.0284311	10.1594	7.2	14.4	15.0356	29.7823	22.1917	18.4606	14.5298	37.2403	42.6773	30008616	1.88098e+06	13263298	14805772	0.330885	0.396698
30	Brantas	-9.51042	-7.76905	-8.74342	8.83988	-19.0408	-101.199	-25.6679			5.27476	0.0213386	14.7852	7.3	14.4	8.06489	16.1181	10.235	25.5075	40.0745	63.9352	71.1509	5519496	875883	3305042	3630595	0.330885	0.396698
31	Red	-5.51796	-4.19307	-4.96484	5.60382	-4.48698	-46.3517	-16.3934	2.19573	0.100928	3.49244	0.0350934	9.0104	7	13	10.024	28.2162	18.651	26.7164	16.3924	56.6277	51.8028	6.21795e+06	3544223	3.15133e+06	2.93068e+06	0.346003	0.431797
32	Yellow River	-10.8787	-5.5638	-8.78875	21.1398	-23.1947	-180.663	-54.5372			3.75854	0.150003	14.6373	7.1	13.2	19.2115	17.9092	10.0632	21.4975	31.3186	59.0895	57.856	2.36501e+06	49341.8	1.21934e+06	1187486	0.362961	0.557007
33	Ogooué	-0.428255	-0.243795	-0.252751	1.33166	-1.27052	-9.06794	-2.92916			4.7865	0.00860118	5.21476	8.2	14	40.9812	54.3545	4.04222	0.622072	0	0.770739	1.73416	89793.8	35407.4	1592.76	3408.26	0.392375	0.298934
34	Godavari	-4.08994	-2.72528	-3.06138	6.31542	-8.59291	-43.3237	-17.1821			3.21109	0.0884369	7.30103	6.6	12.8	25.1485	27.1685	15.3739	17.3505	14.9586	45.9832	39.6591	5224705	753761	2.8496e+06	2564201	0.36388	0.394955
35	Indus	-0.594408	-0.509954	-0.334537	3.02848	-1.06683	-12.4985	-5.70801			4.72128	0.0538842	5.31569	6	12.2	43.7194	34.0139	14.3839	7.81523	0.067538	9.31899	13.9145	950848	89565.4	110169	159515	0.332332	0.306755
36	Magdalena	-2.20276	-1.63774	-1.8962	2.37334	-4.69031	-14.923	-6.68649			4.91279	0.0235627	7.11555	8	13.5	13.9172	54.9031	17.5382	13.2025	0.439007	14.2218	21.3089	2506757	99307.9	167705	262426	0.294409	0.376665
37	Parana	-3.87008	-3.55838	-3.37984	3.5572	-6.55145	-30.8685	-10.0995			0.202619	0.0488962	4.0727	7.2	12.2	12.6675	30.2563	22.6994	29.1031	5.27361	85.9303	44.7896	714884	51652.6	679621	398029	0.37744	0.375826
38	Grijalva	-2.04376	-2.05658	-1.61346	2.54818	-3.37985	-14.9612	-6.19695			6.10361	0.0514091	8.14737	7.6	13.2	21.0544	43.7491	23.7199	11.1854	0.291225	5.32525	21.3634	345922	151685	4264.45	32446.8	0.37979	0.360955
39	Zambezi	-0.781412	-0.795796	-0.504114	2.19059	-1.35686	-11.3101	-4.30644			3.82631	0.0776887	4.60772	7.7	13.8	35.4868	49.5293	12.4465	2.52053	0.0169289	7.75062	6.65494	864265	10828.9	18360.6	15907.5	0.290269	0.262376
40	Fraser	-0.398967	0.939505	-0.140122	3.6645	-4.655	-36.0241	-7.90484	1.05682	0.36632	1.66806	0.040426	2.06703	5.6	9.6	64.8789	17.2614	6.52523	8.83099	2.5035	23.7943	14.3311	2.65775e+06	219728	134764	52571.4	0.607058	0.650277

## Sheet: Table 2
S/N	Delta Names	GWS Change		Sediment flux alteration				Urban fraction (UF) expansion (%)			Normalized LIME feature importance (FI) scores & statistics
		Rate (mm/yr)	STD (mm/yr)	Basin ID2	QRiver_pristine	QRiver_disturbed	Flux change (%)	Year 2000	Year 2020	UF change	GWS Change	Sediment flux	Urban fraction	R2	RMSE	MAE
1	Rio Grande	0.442824	0.058277	224773	1238.87	567.238	-54.2131	1.77932	2.07343	16.529	0.113274	0.582062	0.304665	0.708833	0.109033	0.0743701
2	Mississippi	3.65091	0.169238	4267691	27284	20364	-25.3629	4.09882	4.85488	18.4458	0.156355	0.633133	0.210512	0.636048	0.0377988	0.0992742
3	Amazon	6.44068	0.364358	540974	31142	31203	0.195877	0.351694	0.397828	13.1177	0.0563247	0.606351	0.337324	0.771304	0.0612424	0.0445529
4	Senegal	3.41031	0.0897523	472622	561.33	425.58	-24.1836	0.199935	0.294451	47.2735	0.715015	0.192482	0.0925026	0.0926756	0.164959	0.117593
5	Saloum	7.45381	0.0760435	532552	7.19771	7.36867	2.37522	0.781595	1.53426	96.2983	0.0180665	0.780965	0.200968	0.744314	0.0470506	0.0379481
6	Volta	2.54085	0.0986559	811472	548.99	473.53	-13.7452	8.52924	11.087	29.9886	0.175646	0.432222	0.392131	0.847005	0.0666476	0.0350261
7	Niger	5.92559	0.208595	908572	13654	14204	4.02812	2.42293	3.88066	60.1638	0.153607	0.55365	0.292743	0.45506	0.0946679	0.079438
8	Cross River	2.9114	0.380368	859432	1190.24	2258.37	89.7417	1.68321	2.30914	37.1864	0.632357	0.00483333	0.36281	0.769013	0.0214151	0.0183718
9	Wouri	3.20292	0.101995	921322	304.44	346.292	13.7472	4.32347	4.91147	13.6001	0.613925	0.0580703	0.328005	0.642231	0.0698716	0.0468767
10	Nile	-2.32467	0.0847441	200412	33631	672.62	-98	8.63832	12.3837	43.358	0.719012	0.210029	0.0709586	0.732481	0.230618	0.170856
11	Rhone	-0.696244	0.117847	2098785	1605.2	556.07	-65.3582	10.1838	14.8097	45.4237	0.954689	0.00771769	0.0375937	0.520042	0.201014	0.141274
12	Rhine	-1.32179	0.0392021	1248635	1975.9	546.49	-72.3422	18.7246	24.4011	30.3157	0.89304	0.00227049	0.10469	0.875103	0.180911	0.136327
13	Po	-4.13472	0.0433353	1873515	959.87	300.93	-68.6489	5.72784	10.1758	77.6551	0.688178	0.310618	0.00120364	0.560102	0.0819879	0.0691785
14	Vistula	-1.36132	0.1	962135	720.54	40	-94.4486	3.34372	4.34112	29.8291	0.585967	0.301756	0.112277	0.894854	0.161066	0.125954
15	Neva	6.04826	0.1	408	60.9801	17.9776	-70.5189	49.7821	54.7623	10.0039	0.156328	0.112198	0.731474	0.686528	0.0643161	0.0436441
16	Ceyhan/Seyhan	-5.07443	0.224219	3173945	315.44	227.1	-28.0053	0.654328	0.885507	35.3307	0.63645	0.358661	0.00488819	0.815626	0.0750946	0.167285
17	Rioni	-4.75603	0.1	2253325	167.924	158.906	-5.37072	4.47119	5.34655	19.5779	0.848469	0.0299857	0.121545	0.747921	0.0752364	0.167403
18	Kabani	-0.613164	0.0406412	3928736	72.5516	123.653	70.4352	13.0835	16.4487	25.7206	0.516497	0.164269	0.319234	0.785173	0.0121101	0.168451
19	Cauvery	-2.53072	0.0777008	3705266	596.327	491.073	-17.6504	0.268465	0.988523	268.213	0.895538	0.10305	0.00141152	0.746859	0.0312326	0.106707
20	Brahmani	0.60822	0.089119	2729386	276.33	425.504	53.9842	0.229332	0.477501	108.214	0.704394	0.256518	0.0390887	0.494332	0.18831	0.160759
21	Mahanadi	0.897726	0.26892	2763826	1384.4	2130.5	53.8934	1.42243	2.2186	55.973	0.498244	0.393815	0.107941	0.470713	0.206239	0.169679
22	Ganges–Brahmaputra	-3.34122	0.554559	2259146	53453	72644	35.9026	1.40076	2.3043	64.504	0.937888	0.0312971	0.0308152	0.695847	0.0944881	0.0760294
23	Irrawaddy (Ayeyarwady)	-0.707665	0.251232	3032116	10031	10020	-0.10966	1.8859	2.83374	50.2593	0.809691	0.177295	0.0130136	0.286272	0.153944	0.111317
24	Chao Phraya	-8.6416	0.1245	3279946	891.08	690.36	-22.5255	6.07685	9.53651	56.9318	0.376737	0.542076	0.0811869	0.546556	0.164752	0.130248
25	Mekong	-2.68311	0.465386	4050686	15737	15394	-2.17958	0.850094	1.4309	68.3228	0.965186	0.021593	0.0132207	0.61695	0.119531	0.0937185
26	Pearl	-0.9986	0.125579	2372006	5385.6	9290.3	72.5026	18.2695	31.6513	73.2466	0.658577	0.279547	0.0618767	0.601815	0.0613939	0.0449742
27	Yangtze	-1.83073	0.154465	1780166	6097.6	8981.8	47.3006	9.78224	17.879	82.7705	0.904737	0.0917088	0.00355423	0.601396	0.130739	0.107111
28	Chikuma-gawa	NaN	NaN	1019536	88.495	27.3581	-69.0852	13.3312	16.0644	20.5022	0.117103	0.0774471	0.805449	0.360011	0.174695	0.144514
29	Ciliwung	-0.974696	0.0560998	6671696	4.82844	9.53046	97.3818	50.7807	56.7928	11.8395	0.83438	7.65061e-05	0.165544	0.5511	0.0745698	0.0457063
30	Brantas	4.36681	0.1	6928566	194.055	352.694	81.7501	22.2619	31.6776	42.2952	0.712511	0.0904658	0.197023	0.318301	0.218302	0.169247
31	Red	-4.76249	0.1	2765116	2590.1	3325.7	28.4004	2.96722	3.9894	34.4489	0.784038	0.0137384	0.202223	0.862285	0.187138	0.14847
32	Yellow River	-5.724	0.0543517	1005716	7281.5	3827.6	-47.4339	1.39116	4.32029	210.554	0.336994	0.454751	0.208255	0.616339	0.082001	0.0608222
33	Ogooué	4.66342	0.140719	1003672	545.614	545.607	-0.00119816	2.27487	2.29378	0.831516	0.567437	0.379125	0.0534373	0.721365	0.0381031	0.0291533
34	Godavari	2.67381	0.0428388	2996486	3336.8	5249	57.3064	3.40523	4.87091	43.0421	0.71457	0.13842	0.147009	0.333003	0.256397	0.200511
35	Indus	-0.746308	0.10472	2180336	24097	20456	-15.1098	0.0761314	0.420038	451.729	0.887848	0.0990241	0.0131278	0.36489	0.144162	0.11705
36	Magdalena	2.55385	0.0740434	94474	8134.1	8069.8	-0.790499	3.48175	4.0378	15.9706	0.358807	0.378798	0.262395	0.67443	0.117971	0.0826102
37	Parana	-3.28897	0.116097	1210764	8202.8	8127.3	-0.920417	0.663344	1.04738	57.8945	0.915498	0.075248	0.00925452	0.667295	0.109728	0.086817
38	Grijalva	-0.625588	0.0727767	995653	2230.7	2122.2	-4.86394	1.12487	1.25819	11.8519	0.852672	0.0793571	0.0679713	0.623438	0.0975068	0.0726259
39	Zambezi	3.19417	0.104831	1416812	6944.34	4977.8	-28.3185	0.0564979	0.0926552	63.9975	0.540643	0.253106	0.206251	0.479802	0.11892	0.100304
40	Fraser	-1.53783	0.1	2619721	1300.3	1253.8	-3.5761	29.449	32.7195	11.1055	0.917892	0.0380235	0.0440846	0.69576	0.0959116	0.0696804

## Sheet: Table 3
S/N	Delta Names	Processed SAR Images 1				Processed SAR Images 2				Processed SAR Images 3				Processed SAR Images 4
		Orbits	Path	Frame 1	Frame 2	Orbits	Path	Frame 1	Frame 2	Orbits	Path	Frame 1	Frame 2	Orbits	Path	Frame1	Frame 2	Frame 3
1	Rio Grande	Ascending	107	78	83	Descending	143	505
2	Mississippi	Ascending	165	90	95	Ascending	63	87	92
3	Amazon	Descending	68	588	593	Descending	170	590	595
4	Senegal	Ascending	133	1231	1236
5	Saloum	Ascending	133	36	40
6	Volta	Ascending	74	1199
7	Niger	Ascending	103	1191	1196	Ascending	30	1195		Descending	22	572	578	Descending	124	574
8	Cross River	Ascending	30	1195		Descending	124	574
9	Wouri	Ascending	51	575	580	Descending	132	1190
10	Nile	Ascending	58	97	99	Ascending	131	94	99	Descending	167	486	491	Descending	65	489
11	Rhone	Ascending	59	135	140	Descending	37	445
12	Rhine	Ascending	161	166		Descending	110	419
13	Po	Ascending	117	143		Descending	95	440	445
14	Vistula	Ascending	102	173		Descending	124	412	413
15	Neva	Ascending	116	191		Descending	7	392	393
16	Ceyhan/Seyhan	Ascending	14	114		Descending	94	468
17	Rioni	Ascending	145	130	135	Descending	50	451
18	Kabani	Descending	165	558	563
19	Cauvery	Descending	92	551	555
20	Brahmani	Ascending	85	63		Descending	48	524						Descending	121	518	523
21	Mahanadi	Ascending	85	63		Descending	48	524						Descending	121	518	523
22	Ganges–Brahmaputra	Ascending	12	64	69	Ascending	114	65	71
23	Irrawaddy (Ayeyarwady)	Ascending	143	46	51	Ascending	41	44	50	Descending	106	536		Descending	33	537
24	Chao Phraya	Ascending	172	1222	1227	Descending	62	544	549
25	Mekong	Ascending	26	23	28	Ascending	128	29						Descending	18	553	558	563
26	Pearl	Ascending	11	65	71
27	Yangtze	Ascending	171	96	101
28	Chikuma-gawa	Ascending	39	119		Descending	119	466
29	Ciliwung	Ascending	98	1154	1160	Descending	47	609	614
30	Brantas	Ascending	54	1154		Descending	3	615	617
31	Red	Ascending	128	59	64	Ascending	55	62	67					Descending	91	522	527
32	Yellow River	Ascending	69	119		Descending	76	468
33	Ogooué	Descending	55	595
34	Godavari	Descending	19	533	538
35	Indus	Ascending	42	68	77	Descending	78	506	511
36	Magdalena	Ascending	150	30		Ascending	77	31	32					Descending	142	555
37	Parana	Descending	68	702	707
38	Grijalva	Ascending	54	55		Ascending	136	33	58					Descending	99	530
39	Zambezi	Ascending	101	1115		Descending	6	654
40	Fraser	Ascending	137	158		Descending	13	426	431
